# Supplementary material for: Cellular Processes Involved in Jurkat Cells Exposed to Nanosecond Pulsed Electric Field
Source: Int J Mol Sci. 2019 Nov 21;20(23):5847. doi: 10.3390/ijms20235847 (PMC6929111; doi:10.3390/ijms20235847)
Supplement: Supplementary file 1 [file ijms-20-05847-s001.zip › Supplementary file 1-figures_proof1.pdf]

# Supplementary Information

## Cellular processes involved in Jurkat cells exposed to nanosecond pulsed electric field

Huijuan Li <sup>1</sup>, Shibin Liu <sup>1,\*</sup>, Xue Yang <sup>1</sup>, Yongqian Du <sup>1</sup>, Jiezhong Luo <sup>1</sup>, Jie Tan <sup>1</sup>, and Yulong Sun <sup>2,\*</sup>

1 School of Electronics and Information, Northwestern Polytechnical University, Xi'an, 710072, China; [lihuijuan@mail.nwpu.edu.cn](mailto:lihuijuan@mail.nwpu.edu.cn) (H.J.L); [liushibin@nwpu.edu.cn](mailto:liushibin@nwpu.edu.cn) (S.B.L); [yangx@mail.nwpu.edu.cn](mailto:yangx@mail.nwpu.edu.cn) (X.Y); [duyongqian@nwpu.edu.cn](mailto:duyongqian@nwpu.edu.cn) (Y.Q.D); [18829237964@163.com](mailto:18829237964@163.com) (J.Z.L); [jietan@mail.nwpu.edu.cn](mailto:jietan@mail.nwpu.edu.cn) (J.T)

2 Key Laboratory for Space Biosciences & Biotechnology, School of Life Sciences, Northwestern Polytechnical University, Xi'an, 710072, China; [yulongsun@nwpu.edu.cn](mailto:yulongsun@nwpu.edu.cn) (Y.L.S)

\* Correspondence: [liushibin@nwpu.edu.cn](mailto:liushibin@nwpu.edu.cn) (S.B.L); [yulongsun@nwpu.edu.cn](mailto:yulongsun@nwpu.edu.cn) (Y.L.S);

Tel.: +86 29 88491653 (S.B.L); +86 29 88460332 (Y.L.S)

Address: School of Life Sciences, Northwestern Polytechnical University, 127 Youyi Xilu, Xi'an Shaan Xi Province, 710072, PR China

Tel.: +86 29 88460332, E-mail: [yulongsun@nwpu.edu.cn](mailto:yulongsun@nwpu.edu.cn)

---

## **Figure of contents**

### **1. Figures**

(a)

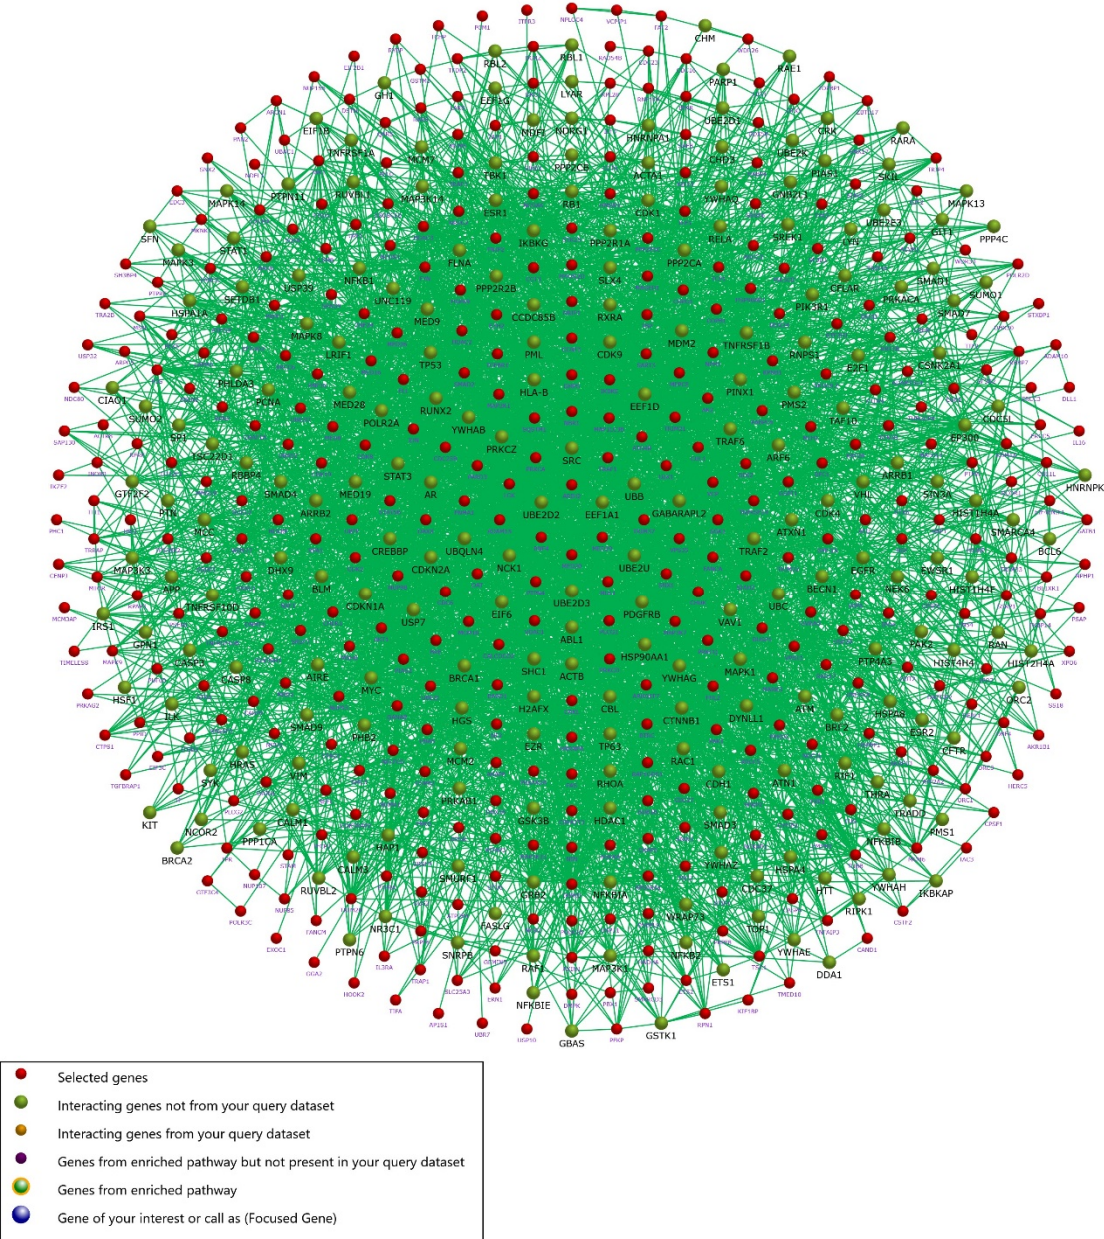

(b)

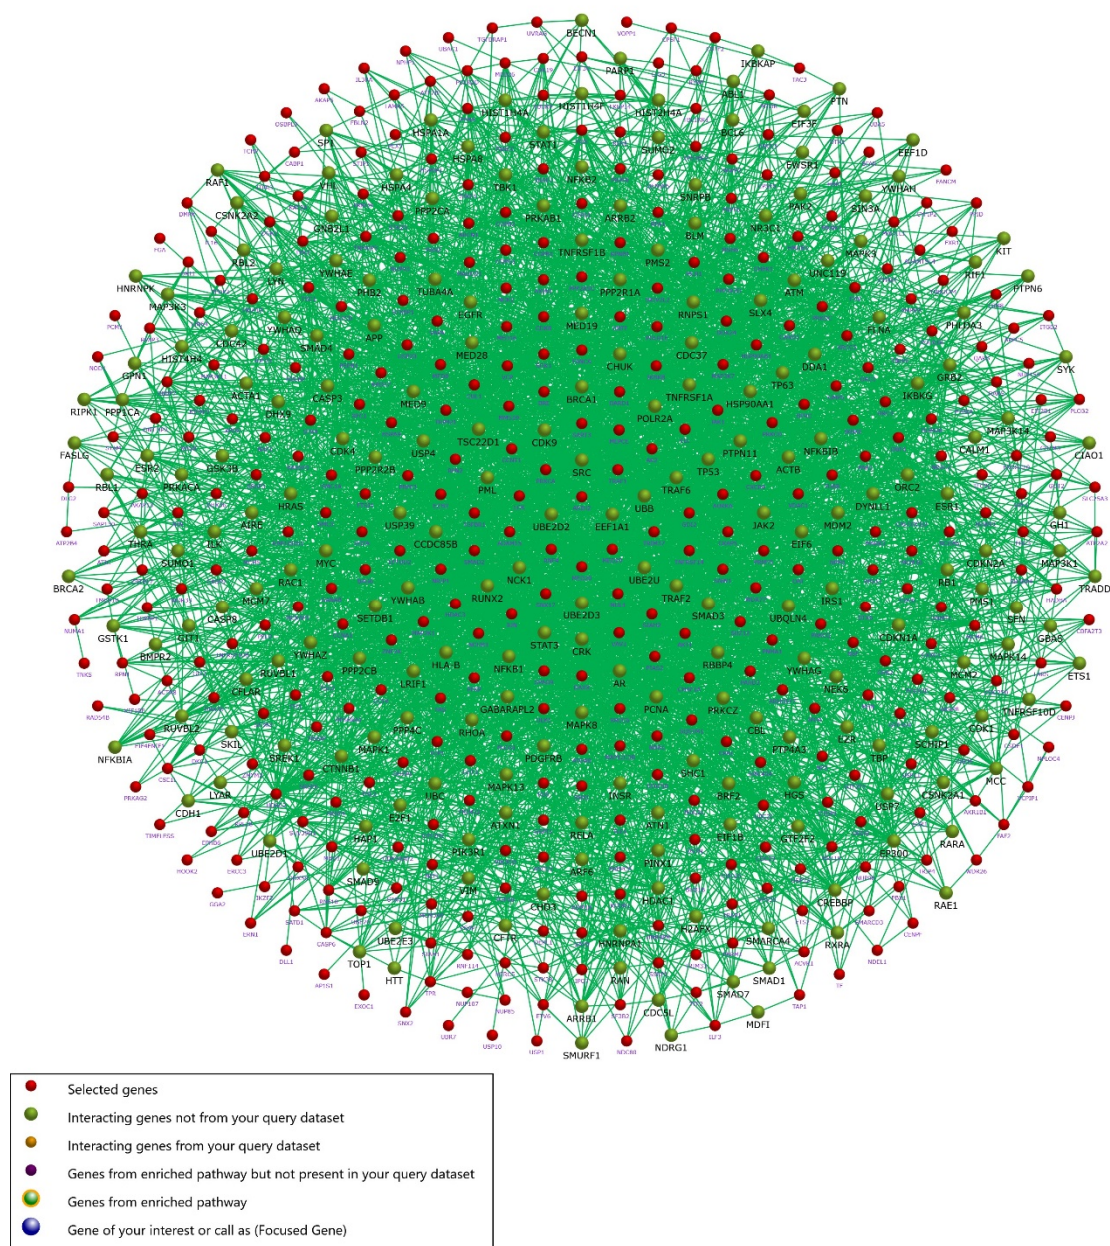

**Figure S1.** The interaction network analysis of differentially expressed genes for group 1 (a) and group 2 (b). Nodes less than 10 were removed because too many nodes will affect the display of data.

(a)

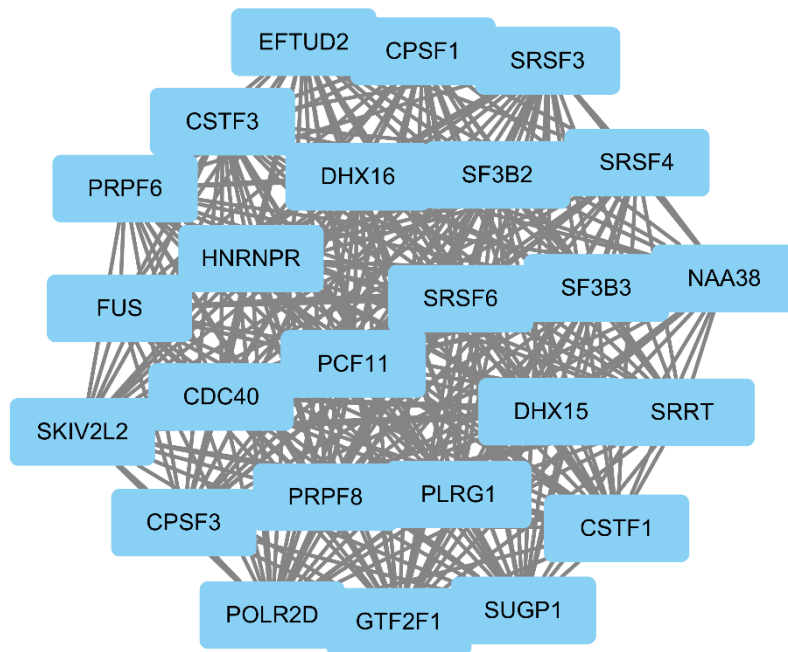

(b)

| GeneSet         | P-value  | Correct p-value | Nodes                                                                                                                                                       |
|-----------------|----------|-----------------|-------------------------------------------------------------------------------------------------------------------------------------------------------------|
| RNA splicing    | 8.73E-39 | 1.12E-36        | SF3B2 SF3B3 CPSF1 FUS CSTF3 CPSF3<br>HNRNPR PLRG1 GTF2F1 PRPF8 CDC40 EFTUD2<br>PRPF6 PCF11 POLR2D CSTF1 DHX15 DHX16 SRSF3<br>SRSF4 NAA38 SRSF6 SKIV2L2      |
| RNA processing  | 1.47E-34 | 9.39E-33        | SF3B2 SF3B3 CPSF1 FUS CSTF3 CPSF3 SRRT<br>HNRNPR PLRG1 GTF2F1 PRPF8 CDC40 EFTUD2<br>PRPF6 PCF11 POLR2D CSTF1 DHX15 DHX16 SRSF3<br>SRSF4 NAA38 SRSF6 SKIV2L2 |
| mRNA processing | 2.60E-30 | 1.11E-28        | SF3B2 SF3B3 CPSF1 CSTF3 CPSF3 HNRNPR<br>PLRG1 PRPF8 CDC40 EFTUD2 PRPF6 PCF11 CSTF1<br>DHX15 DHX16 SRSF3 SRSF4 NAA38 SRSF6 SKIV2L2                           |

(c)

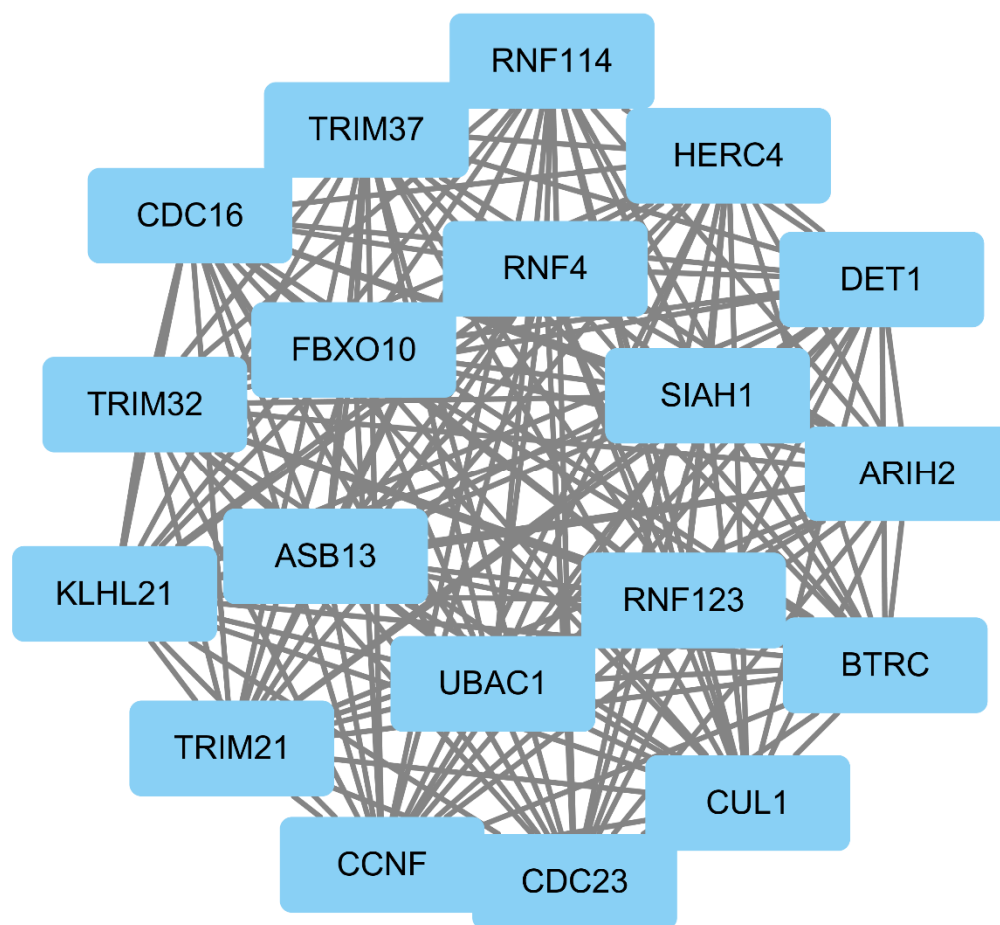

(d)

| GeneSet                                                            | P-value  | Correct p-value | Nodes                                                                    |
|--------------------------------------------------------------------|----------|-----------------|--------------------------------------------------------------------------|
| protein ubiquitination                                             | 5.62E-19 | 1.66E-16        | CDC23 CCNF SIAH1 CDC16 CUL1<br>KLHL21 ARIH2 RNF4 FBXO10 TRIM21<br>TRIM32 |
| protein modification<br>by small protein<br>conjugation            | 1.48E-18 | 2.18E-16        | CDC23 CCNF SIAH1 CDC16 CUL1<br>KLHL21 ARIH2 RNF4 FBXO10 TRIM21<br>TRIM32 |
| protein modification<br>by small protein<br>conjugation or removal | 1.62E-17 | 1.59E-15        | CDC23 CCNF SIAH1 CDC16 CUL1<br>KLHL21 ARIH2 RNF4 FBXO10 TRIM21<br>TRIM32 |

(e)

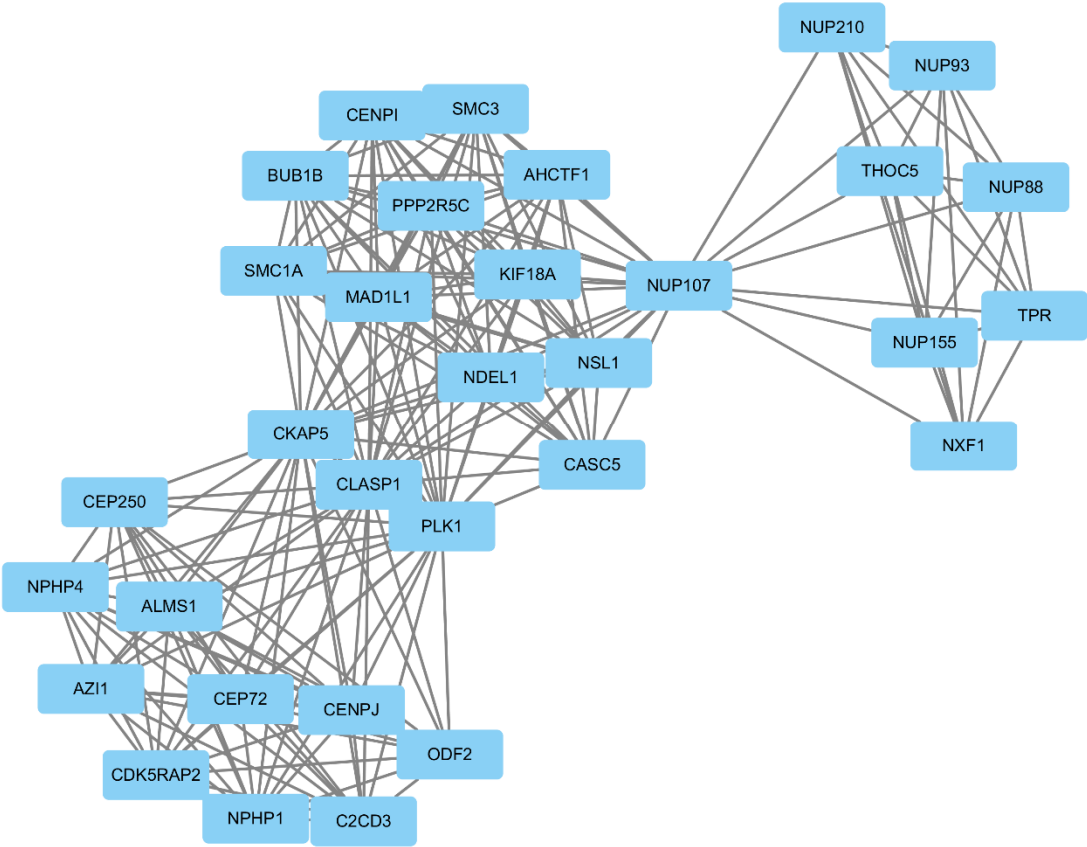

(f)

| GeneSet                                  | P-value  | Correct p-value | Nodes                                                                     |
|------------------------------------------|----------|-----------------|---------------------------------------------------------------------------|
| microtubule<br>cytoskeleton organization | 8.50E-15 | 1.58E-12        | KIF18A CENPJ BUB1B<br>CASC5 CEP72 CEP250 SMC3<br>SMC1A CKAP5 CLASP1 NDEL1 |
| establishment of RNA<br>localization     | 1.11E-14 | 1.58E-12        | NUP93 NXF1 AHCTF1<br>NUP107 NUP155 NUP210 TPR<br>NUP88 THOC5 CKAP5        |
| nucleic acid transport                   | 1.11E-14 | 1.58E-12        | NUP93 NXF1 AHCTF1<br>NUP107 NUP155 NUP210 TPR<br>NUP88 THOC5 CKAP5        |

(g)

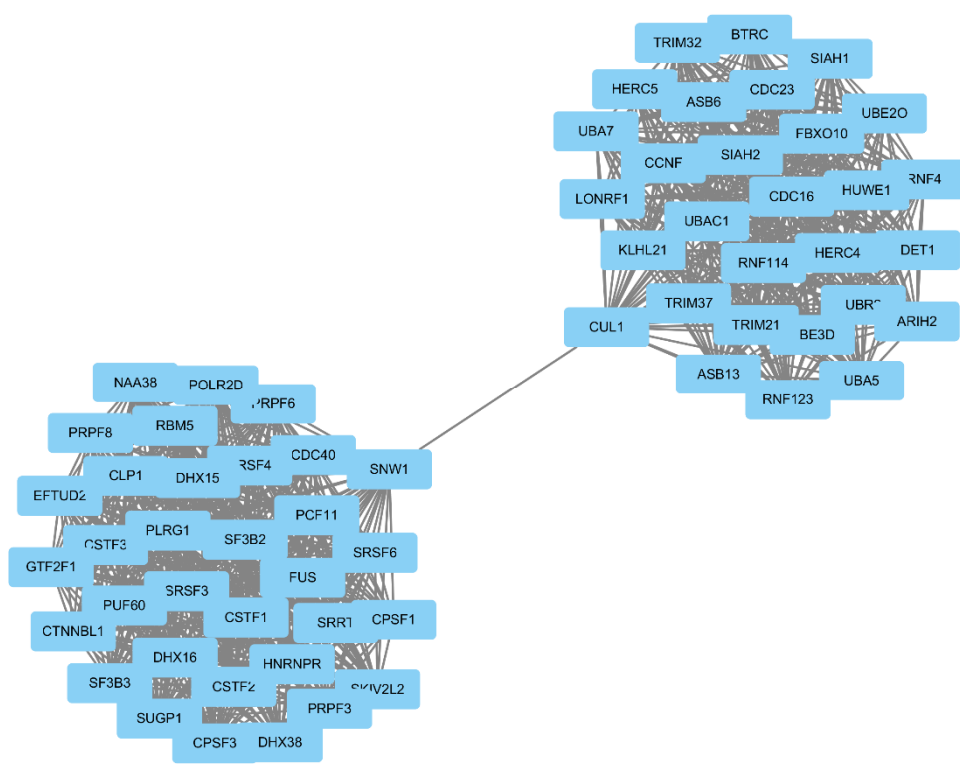

(h)

| GeneSet            | P-value  | Correct<br>p-value | Nodes                                                                                                                                                                                            |
|--------------------|----------|--------------------|--------------------------------------------------------------------------------------------------------------------------------------------------------------------------------------------------|
| RNA<br>splicing    | 5.04E-37 | 2.23E-34           | SF3B2 SF3B3 CSTF3 CSTF2 HNRNPR PRPF8<br>EFTUD2 PUF60 PCF11 CLP1 POLR2D DHX15 CSTF1<br>DHX16 DHX38 RBM5 CPSF1 FUS CPSF3 PLRG1<br>GTF2F1 CDC40 PRPF6 SNW1 PRPF3 SRSF3 SRSF4<br>NAA38 SRSF6 SKIV2L2 |
|                    |          |                    |                                                                                                                                                                                                  |
| mRNA<br>processing | 7.63E-31 | 1.69E-28           | SF3B2 SF3B3 CSTF3 CSTF2 HNRNPR PRPF8<br>EFTUD2 PUF60 PCF11 CLP1 DHX15 CSTF1 DHX16<br>DHX38 RBM5 CPSF1 CPSF3 PLRG1 CDC40 PRPF6<br>SNW1 PRPF3 SRSF3 SRSF4 NAA38 SRSF6 SKIV2L2                      |
|                    |          |                    |                                                                                                                                                                                                  |

RNA  
processing

1.68E-29

2.49E-27

SF3B2 SF3B3 CSTF3 CSTF2 SRRT HNRNPR PRPF8  
EFTUD2 PUF60 PCF11 CLP1 POLR2D DHX15 CSTF1  
DHX16 DHX38 RBM5 CPSF1 FUS CPSF3 PLRG1  
GTF2F1 CDC40 PRPF6 SNW1 PRPF3 SRSF3 SRSF4  
NAA38 SRSF6 SKIV2L2

(i)

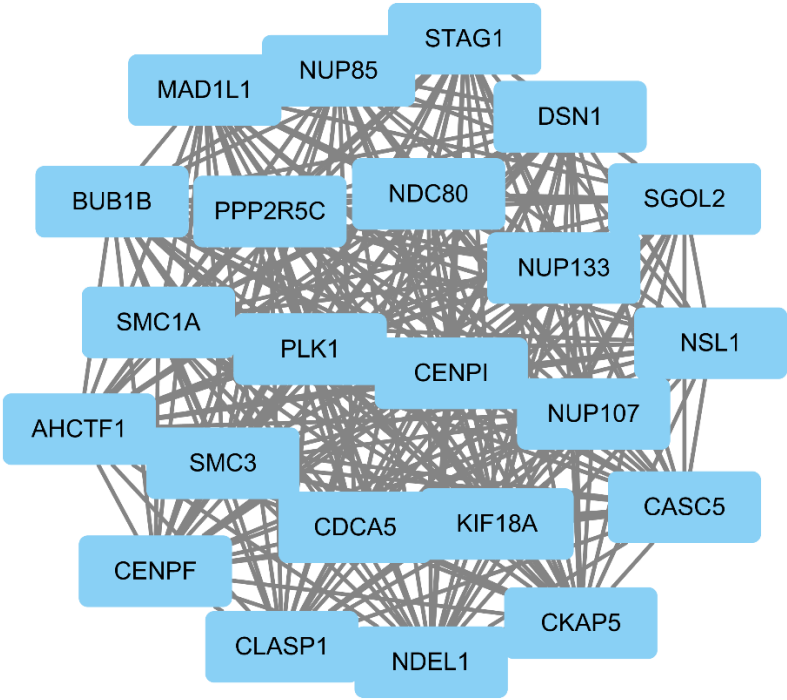

(j)

| GeneSet          | P-value  | Correct p-value | Nodes                                                                                                |
|------------------|----------|-----------------|------------------------------------------------------------------------------------------------------|
| nuclear division | 3.92E-22 | 6.73E-20        | CDCA5 PLK1 BUB1B CASC5 SMC1A SMC3 CKAP5<br>NSL1 NDC80 CENPF STAG1 DSN1 KIF18A CLASP1<br>MAD1L1       |
| mitosis          | 3.92E-22 | 6.73E-20        | CDCA5 PLK1 BUB1B CASC5 SMC1A SMC3 CKAP5<br>NSL1 NDC80 CENPF STAG1 DSN1 KIF18A CLASP1<br>MAD1L1       |
| cell division    | 4.24E-22 | 6.73E-20        | AHCTF1 CDCA5 PLK1 BUB1B CASC5 SMC1A<br>SMC3 CKAP5 NSL1 NDC80 CENPF STAG1 SGOL2<br>DSN1 CLASP1 MAD1L1 |

(k)

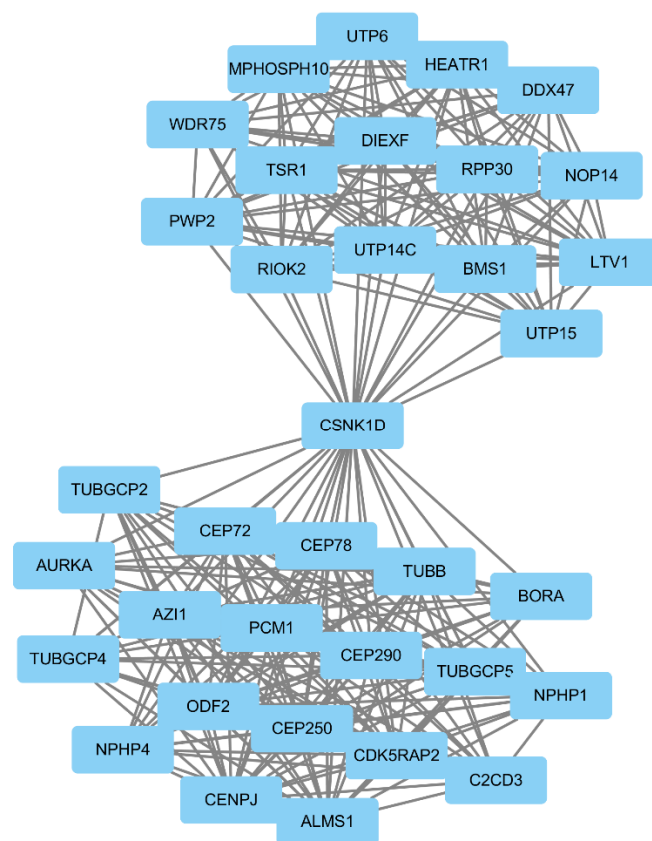

(l)

| GeneSet                                     | P-value  | Correct<br>p-value | Nodes                                                                                                |
|---------------------------------------------|----------|--------------------|------------------------------------------------------------------------------------------------------|
| microtubule<br>cytoskeleton<br>organization | 1.05E-11 | 4.34E-09           | PCM1 TUBGCP2 TUBB CENPJ TUBGCP5 CEP250<br>CEP72 TUBGCP4 AURKA                                        |
| ribosome<br>biogenesis                      | 1.97E-10 | 4.08E-08           | UTP15 NOP14 UTP6 BMS1 HEATR1 MPHOSPH10<br>TSR1 UTP14C                                                |
| cellular<br>component biogenesis            | 3.86E-10 | 5.31E-08           | UTP15 NOP14 UTP6 C2CD3 TUBGCP2 TUBB<br>HEATR1 PCM1 BMS1 CENPJ ALMS1 MPHOSPH10<br>TSR1 TUBGCP4 UTP14C |

**Figure S2.** The 3 sub-networks from the protein–protein interaction network. Group 1: (a) Module 1. (b) The enriched pathways of module 1. (c) Module 2. (d) The enriched pathways of module 2. (e) Module 3. (f) The enriched pathways of module 3. Group 2: (g) Module 1. (h) The enriched pathways of module 1. (i) Module 2. (j) The enriched pathways of module 2. (k) Module 3. (l) The enriched pathways of module 3.

(a)

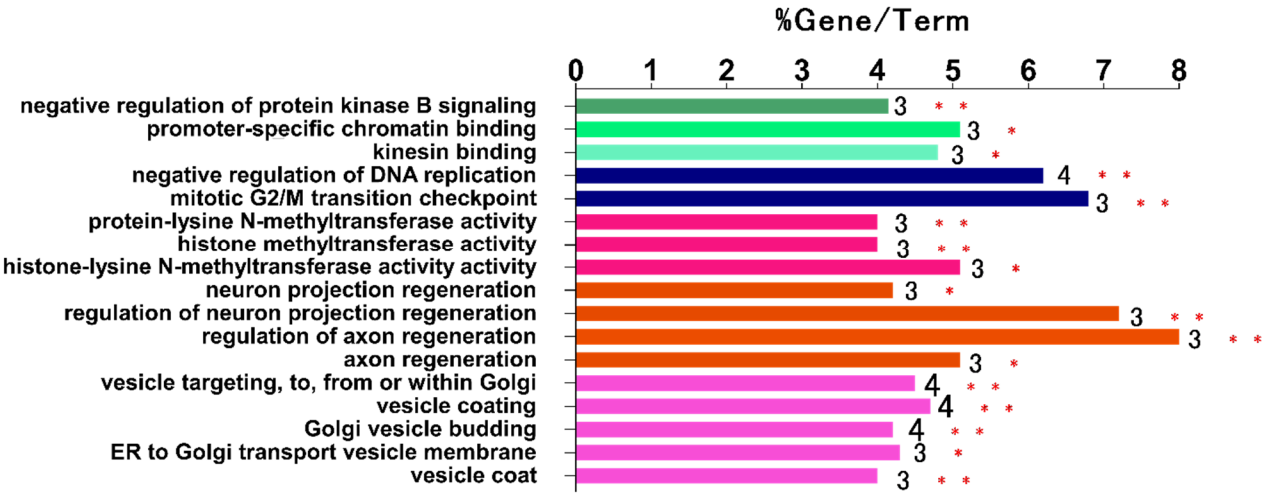

(b)

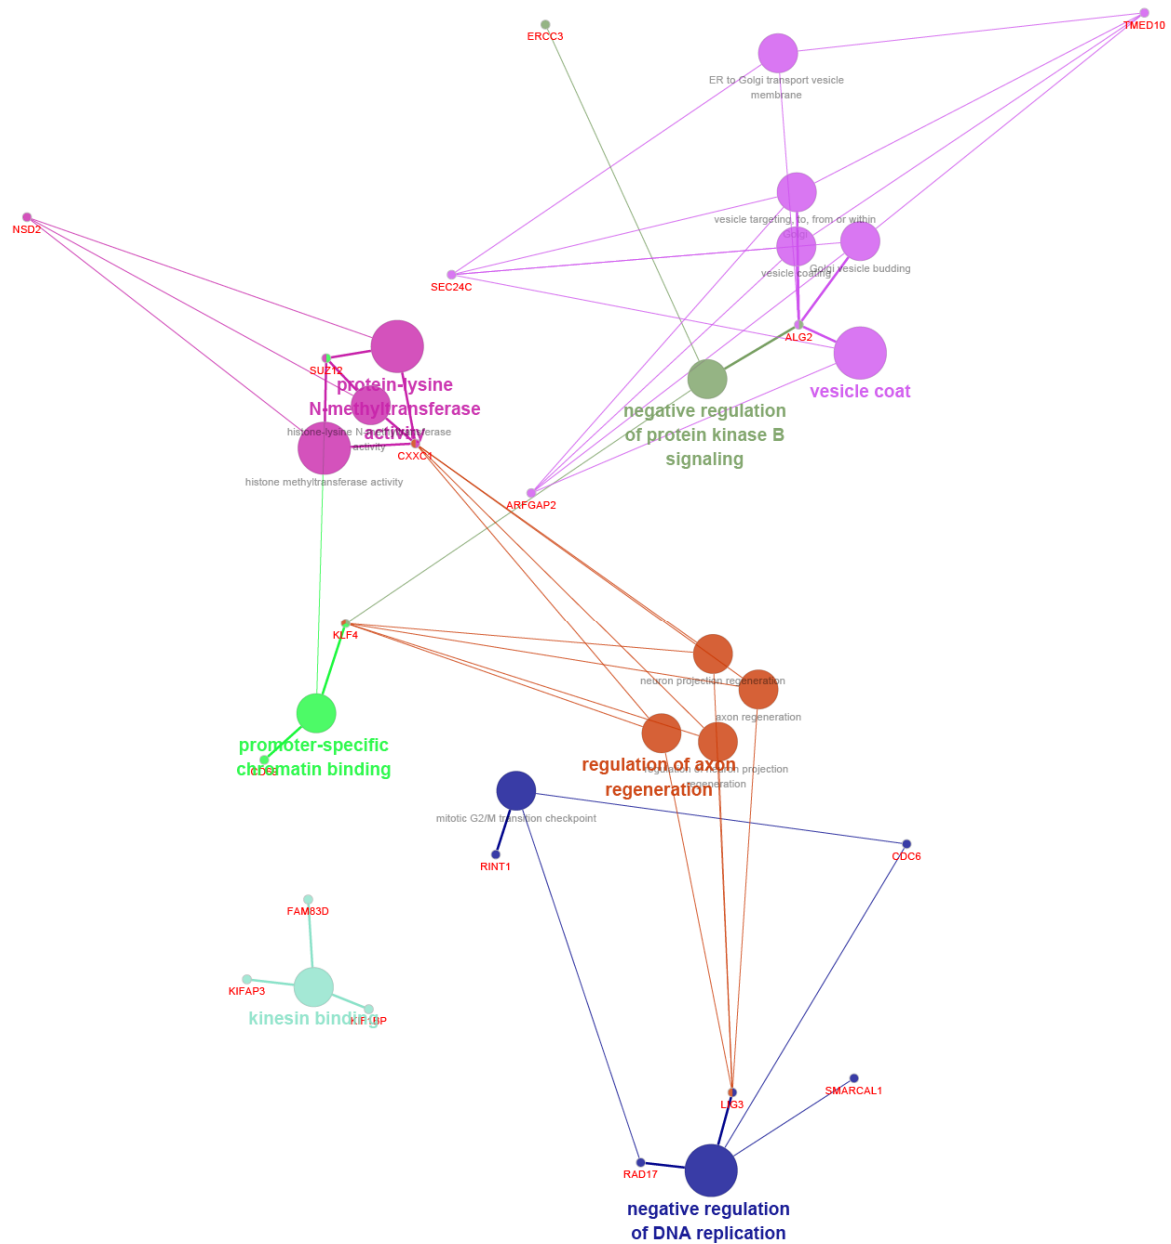

**Figure S3.** The top 100 genes were performed functional enrichment analysis using ClueGo tool of group 1. (a) Enriched pathways by the 100 genes. Pathways were colored based on classification (The terms were categorized in two groups shown in the two colors.). (b) Pathway-enrichment analysis using ClueGO for the top 100 genes.

(a)

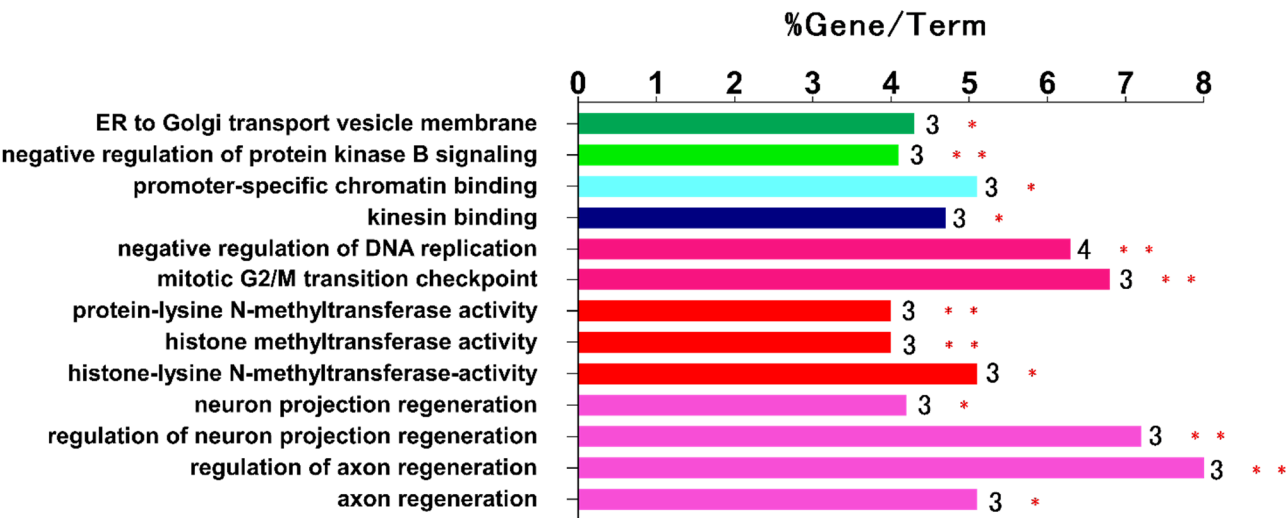

(b)

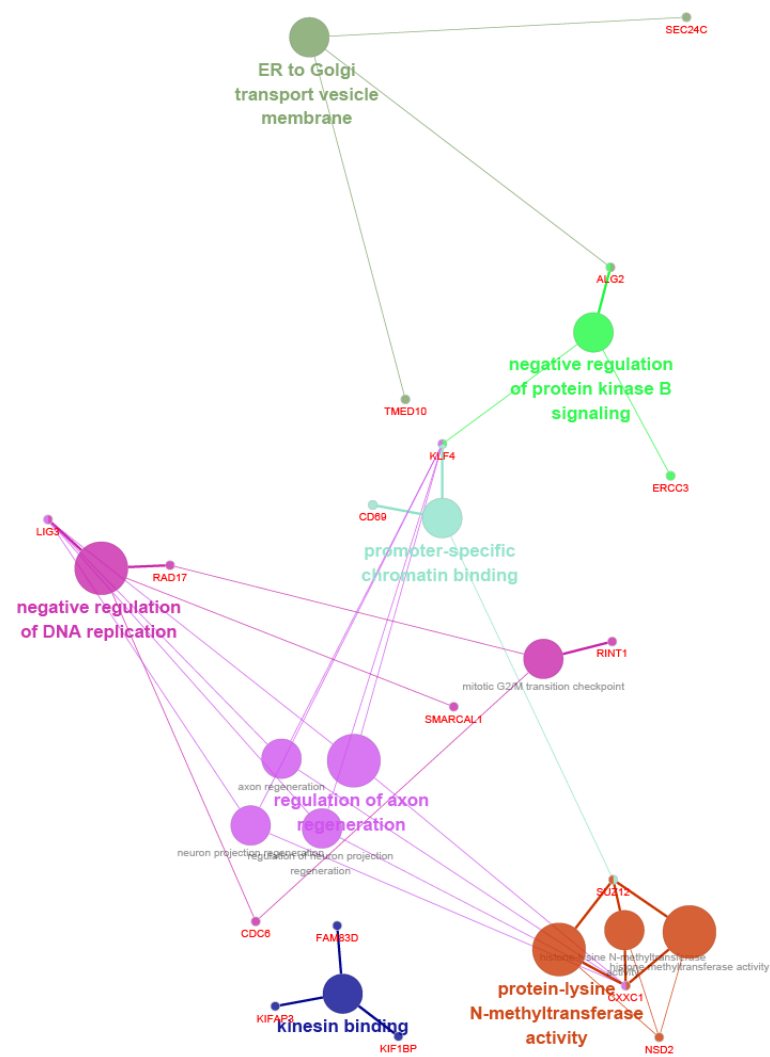

**Figure S4.** The top 100 genes were performed functional enrichment analysis using ClueGO tool of group 2. (a) Enriched pathways by the 100 genes. Pathways were colored based on classification (The terms were categorized in two groups shown in the two colors.). (b) Pathway-enrichment analysis using ClueGO for the top 100 genes.

(a)

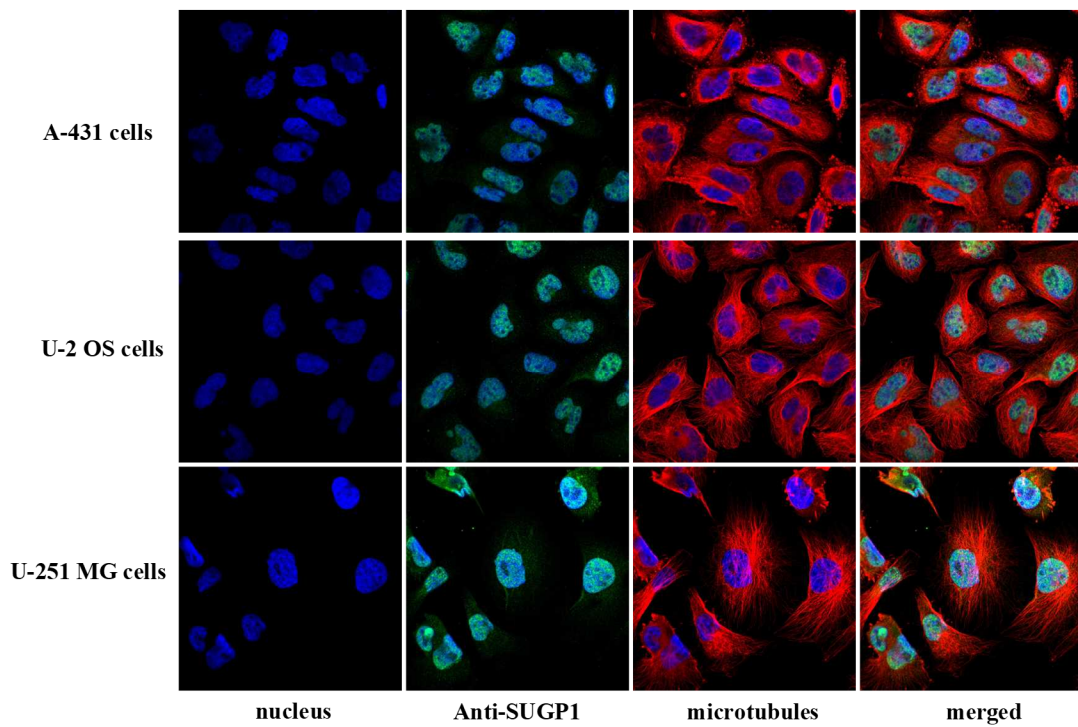

(b)

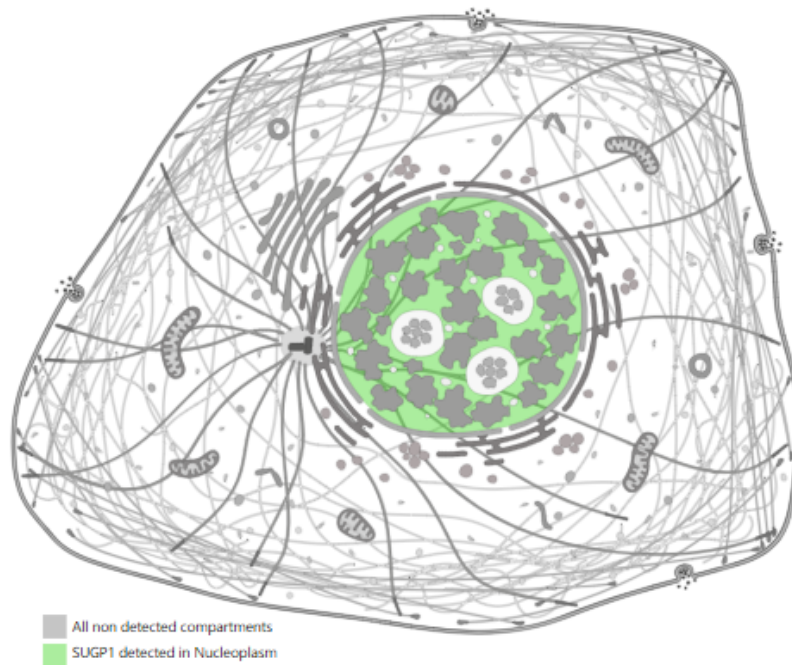

**Figure S5.** *SUGP1* localization in human cells (<https://www.proteinatlas.org/ENSG00000146648-SUGP1/cell>). (a) The localization of *SUGP1* protein in human cells. Blue: nucleus; Green: *SUGP1*; Red: microtubules. (b): Proposed schematic outline of *SUGP1* in human cells (The Human Protein Atlas images are licensed under CC BY-SA 3.0 (<https://creativecommons.org/licenses/by-sa/3.0/>)).

(a)

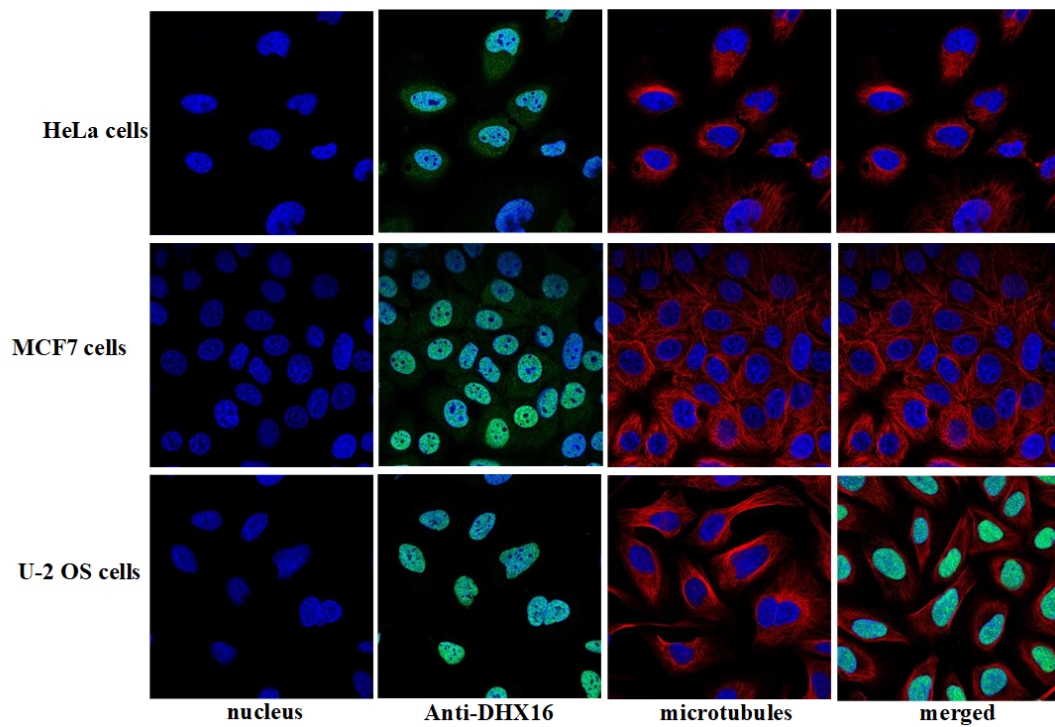

(b)

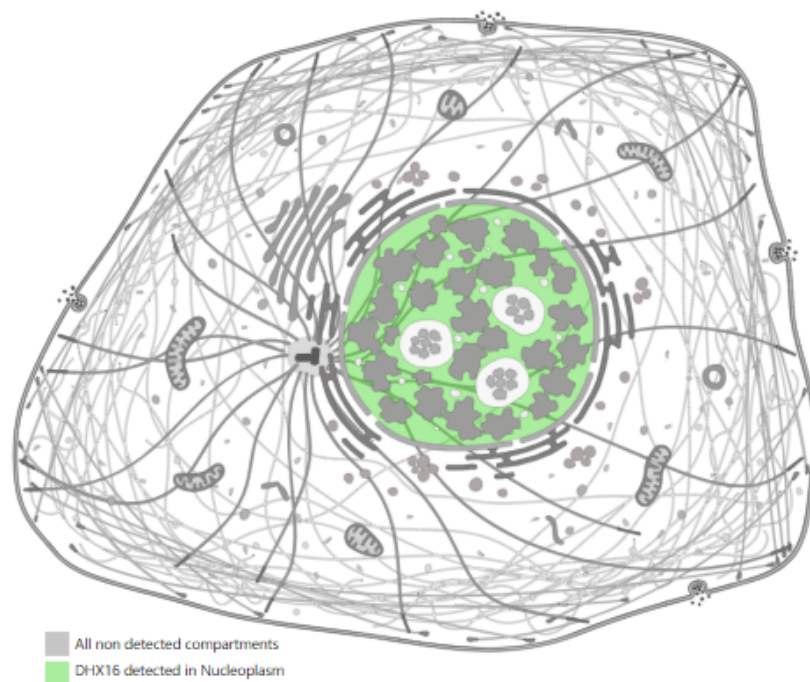

**Figure S6.** *DHX16* localization in human cells (<https://www.proteinatlas.org/search/DHX16>). (a) The localization of *DHX16* protein in human cells. Blue: nucleus; Green: *DHX16*; Red: microtubules. (b): Proposed schematic outline of *DHX16* in human cells (The Human Protein Atlas images are licensed under CC BY-SA 3.0 (<https://creativecommons.org/licenses/by-sa/3.0>)).

(a)

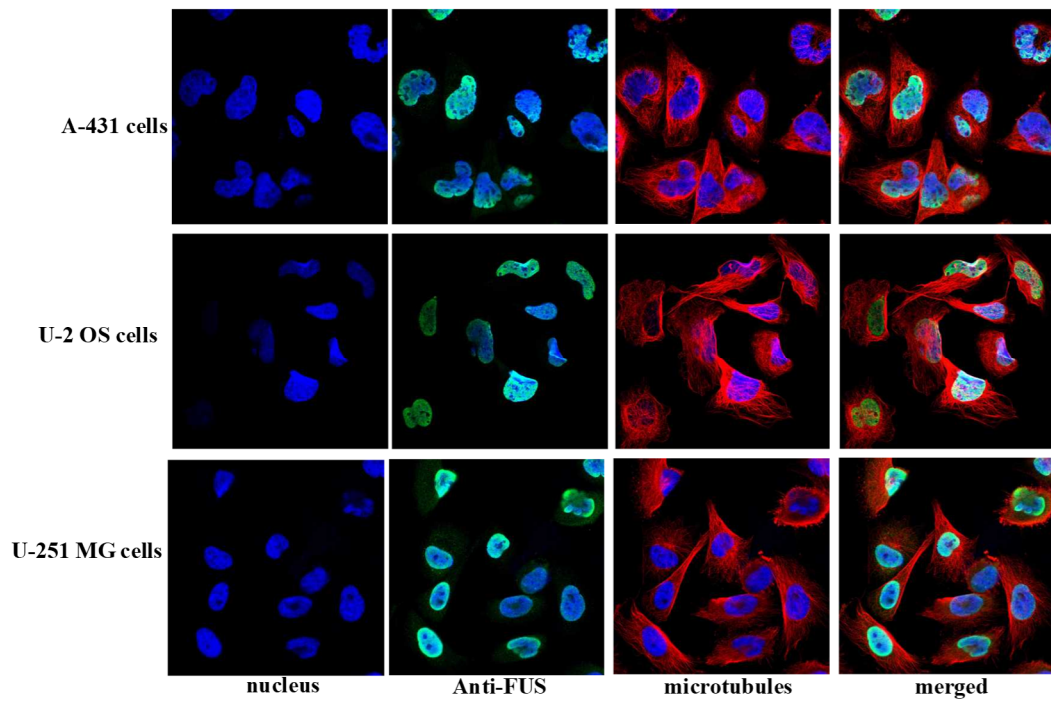

(b)

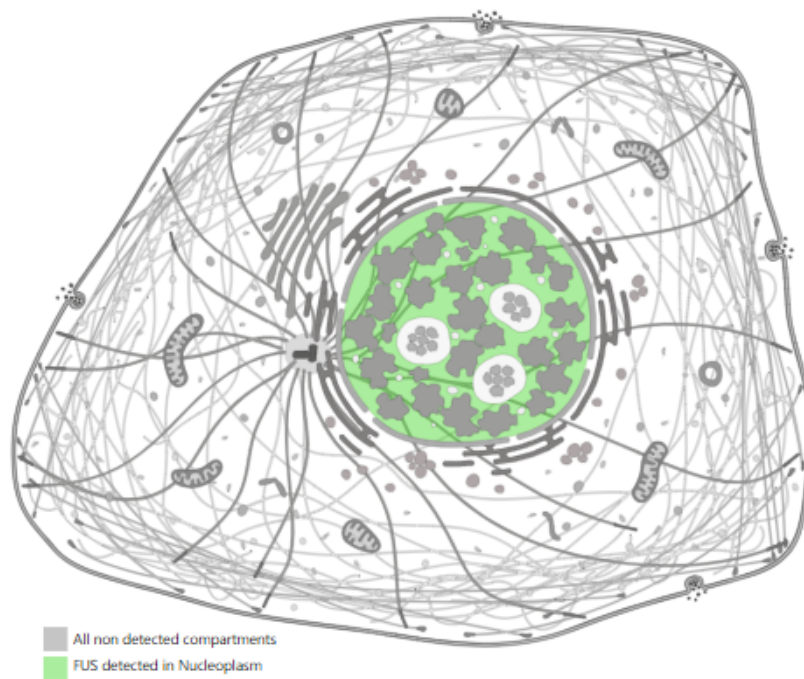

**Figure S7.** *FUS* localization in human cells (<https://www.proteinatlas.org/search/FUS>). (a) The localization of *FUS* protein in human cells. Blue: nucleus; Green: *FUS*; Red: microtubules. (b): Proposed schematic outline of *FUS* in human cells (The Human Protein Atlas images are licensed under CC BY-SA 3.0 (<https://creativecommons.org/licenses/by-sa/3.0>)).

(a)

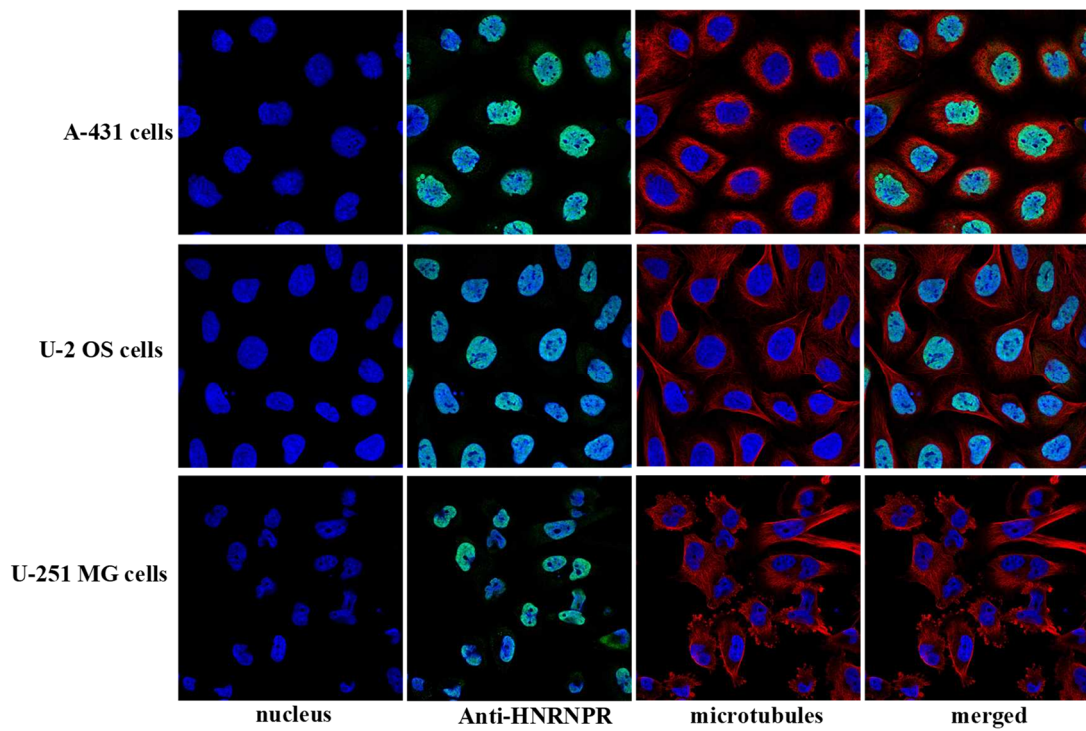

(b)

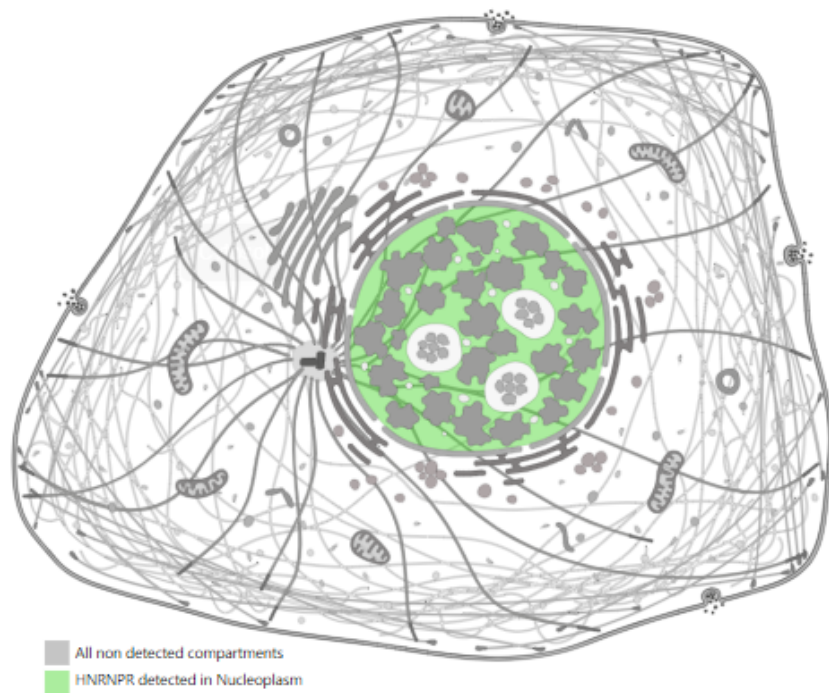

**Figure S8.** *HNRNPR* localization in human cells (<https://www.proteinatlas.org/search/HNRNPR>). (a) The localization of *HNRNPR* protein in human cells. Blue: nucleus; Green: *HNRNPR*; Red: microtubules. (b): Proposed schematic outline of *HNRNPR* in human cells (The Human Protein Atlas images are licensed under CC BY-SA 3.0 (<https://creativecommons.org/licenses/by-sa/3.0>)).

(a)

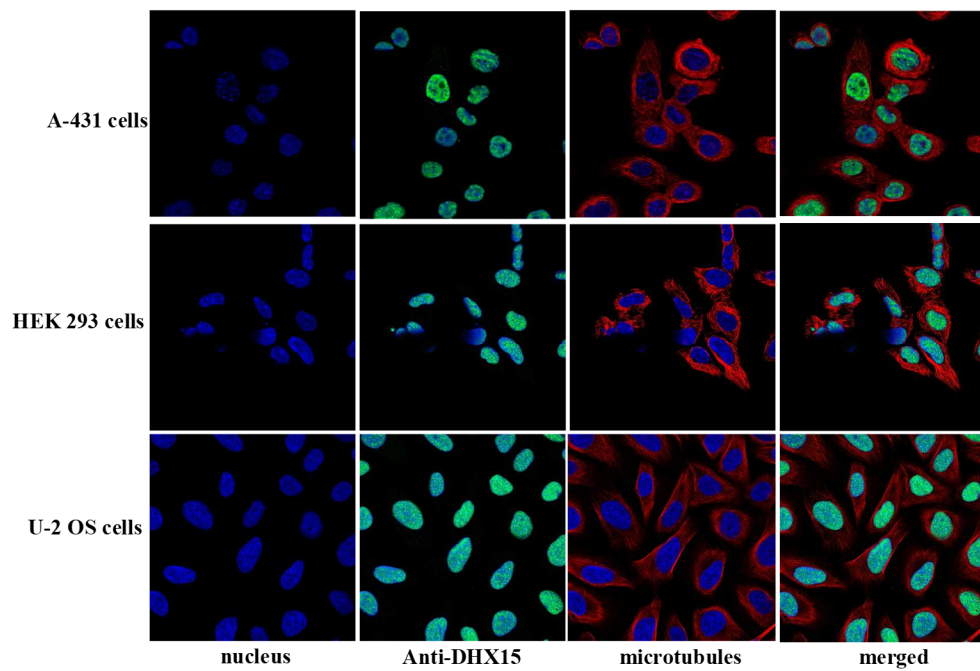

(b)

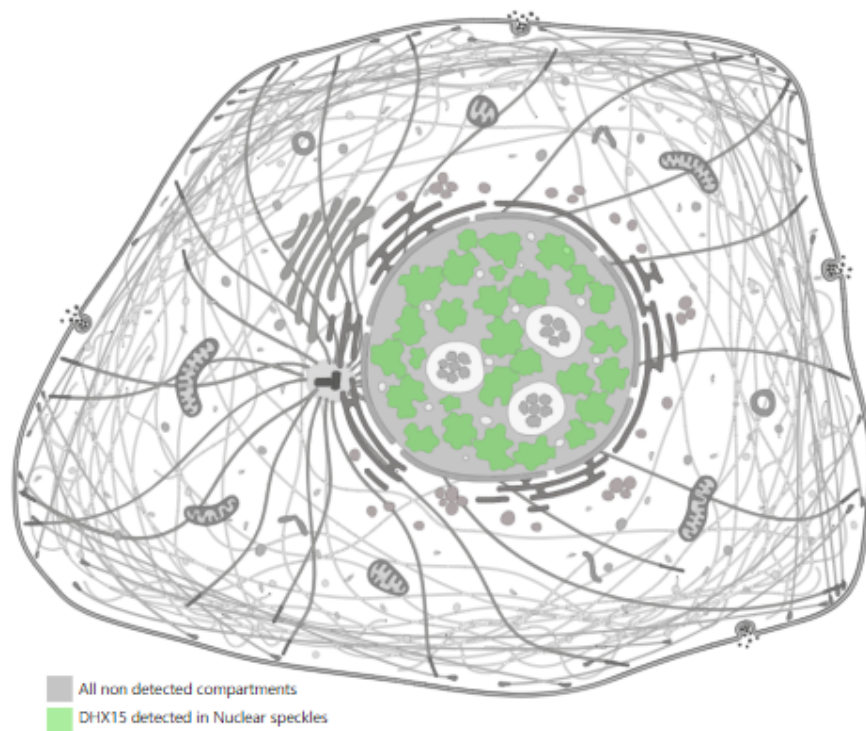

**Figure S9.** *DHX15* localization in human cells (<https://www.proteinatlas.org/search/DHX15>). (a) The localization of *DHX15* protein in human cells. Blue: nucleus; Green: *DHX15*; Red: microtubules. (b): Proposed schematic outline of *DHX15* in human cells (The Human Protein Atlas images are licensed under CC BY-SA 3.0 (<https://creativecommons.org/licenses/by-sa/3.0>)).

(a)

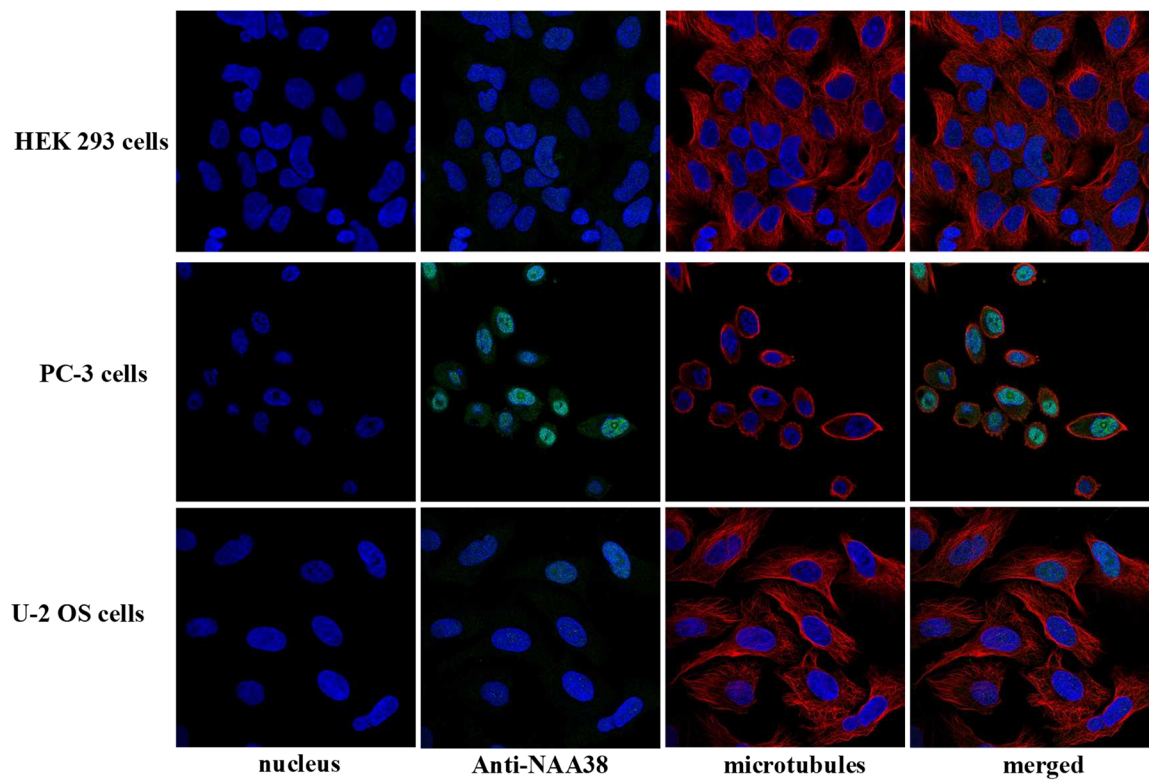

(b)

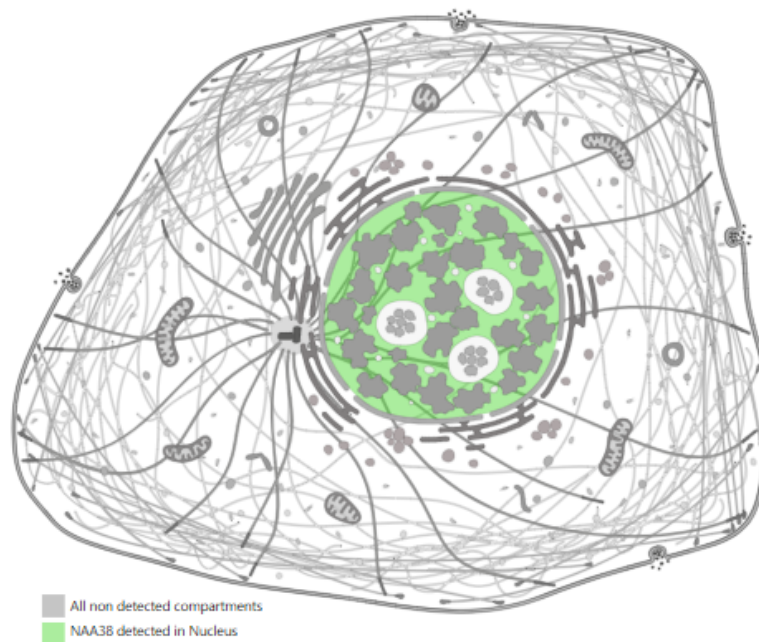

**Figure S10.** NAA38 localization in human cells (<https://www.proteinatlas.org/search/NAA38>). (a) The localization of NAA38 protein in human cells. Blue: nucleus; Green: NAA38; Red: microtubules. (b): Proposed schematic outline of NAA38 in human cells (The Human Protein Atlas images are licensed under CC BY-SA 3.0 (<https://creativecommons.org/licenses/by-sa/3.0>)).

(a)

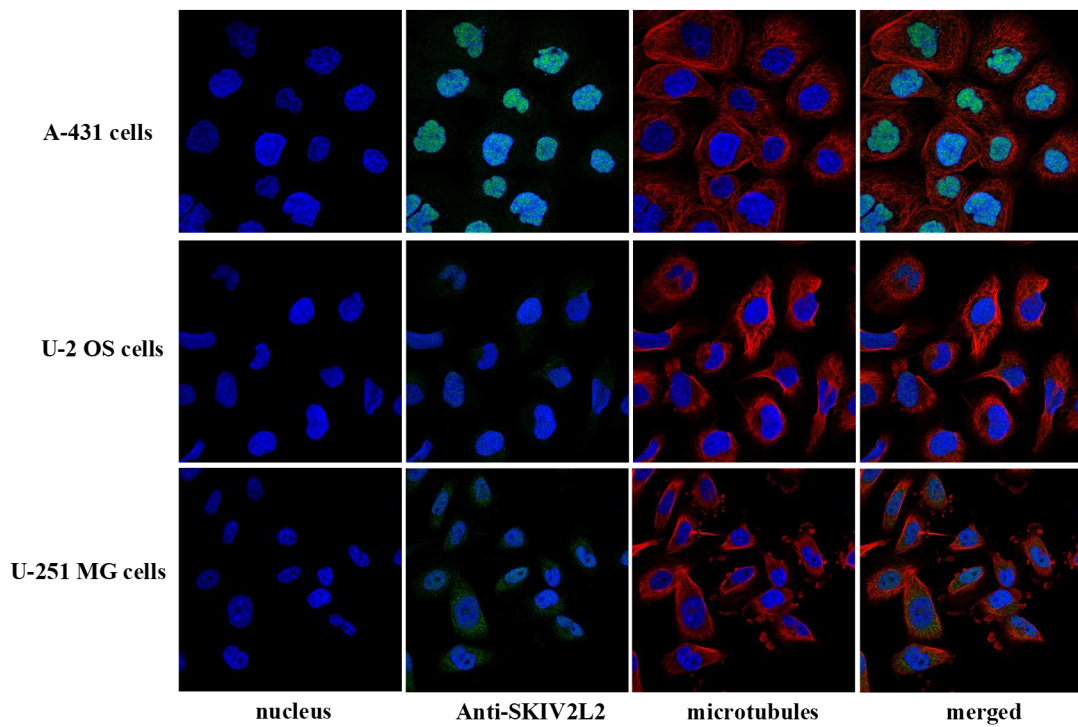

(b)

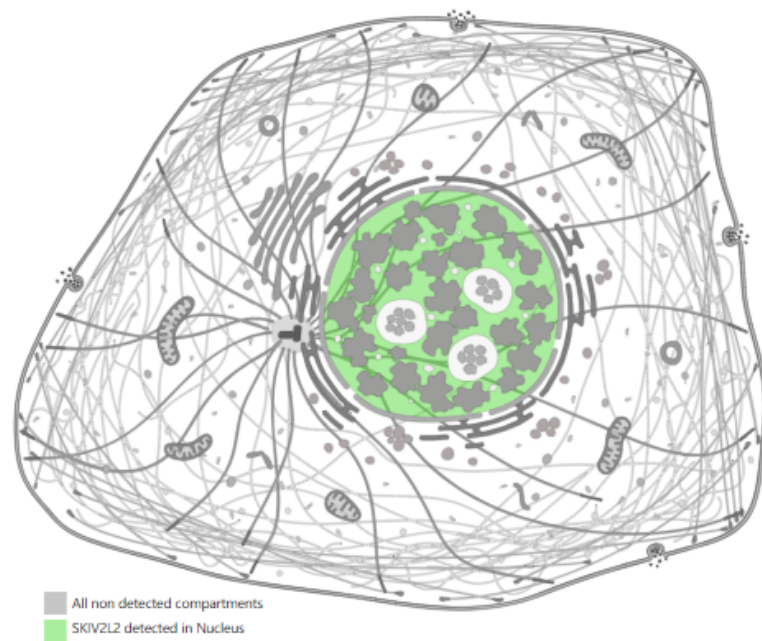

**Figure S11.** *SKIV2L2* localization in human cells (<https://www.proteinatlas.org/search/SKIV2L2>). (a) The localization of *SKIV2L2* protein in human cells. Blue: nucleus; Green: *SKIV2L2*; Red: microtubules. (b): Proposed schematic outline of *SKIV2L2* in human cells (The Human Protein Atlas images are licensed under CC BY-SA 3.0 (<https://creativecommons.org/licenses/by-sa/3.0>)).

(a)

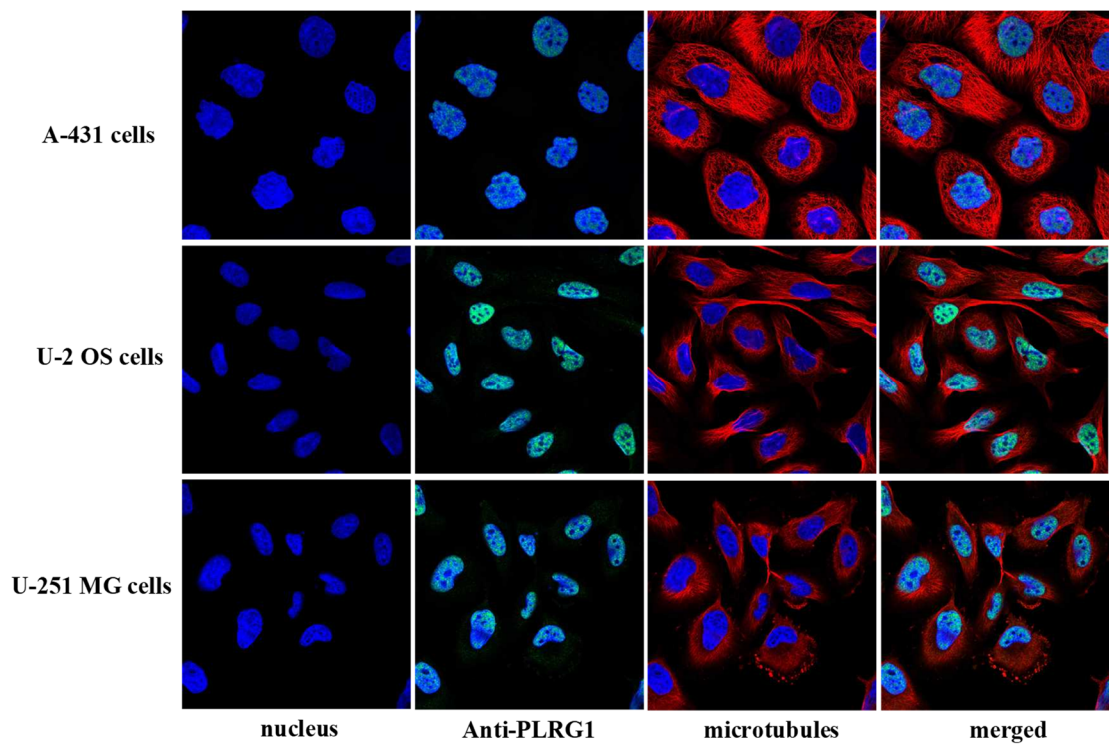

(b)

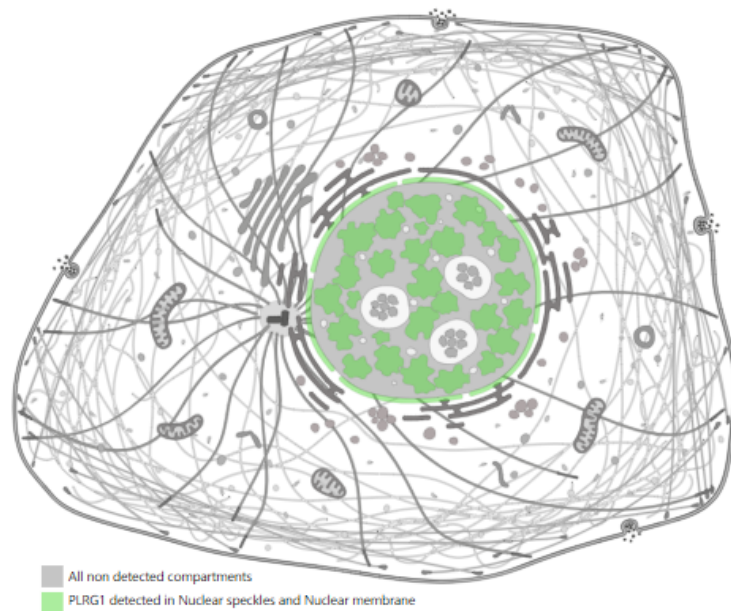

**Figure S12.** *PLRG1* localization in human cells (<https://www.proteinatlas.org/search/PLRG1>). (a) The localization of *PLRG1* protein in human cells. Blue: nucleus; Green: *PLRG1*; Red: microtubules. (b): Proposed schematic outline of *PLRG1* in human cells (The Human Protein Atlas images are licensed under CC BY-SA 3.0 (<https://creativecommons.org/licenses/by-sa/3.0>)).

(a)

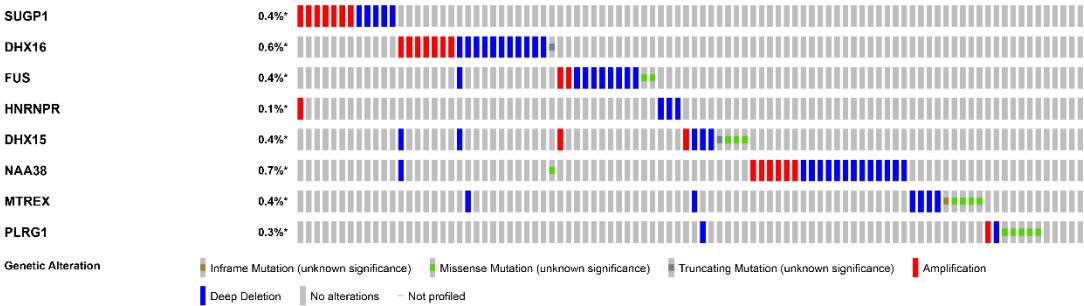

(b)

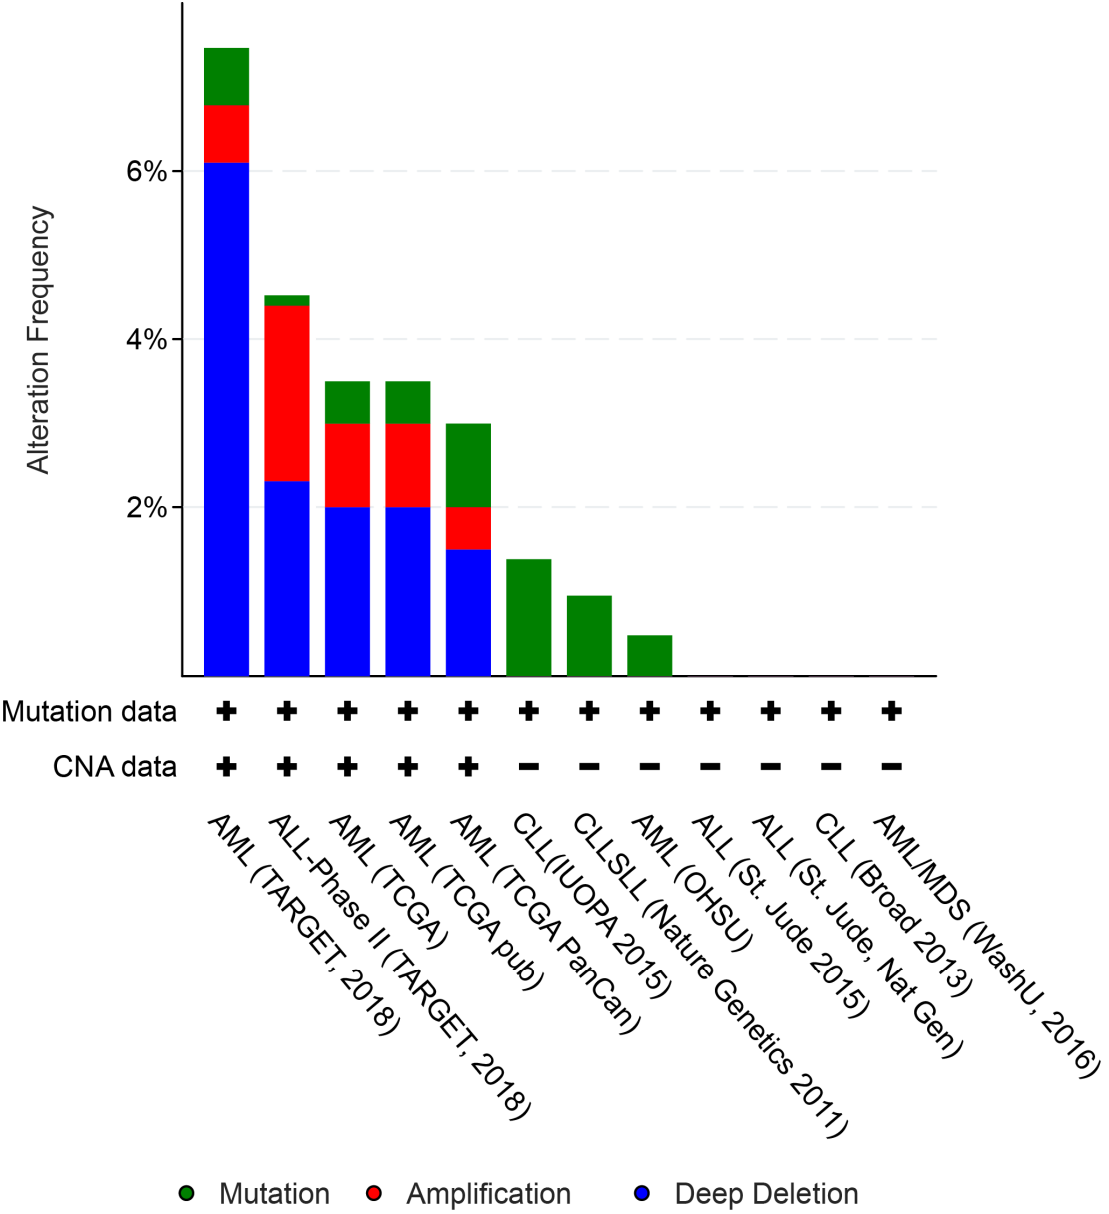

(c)

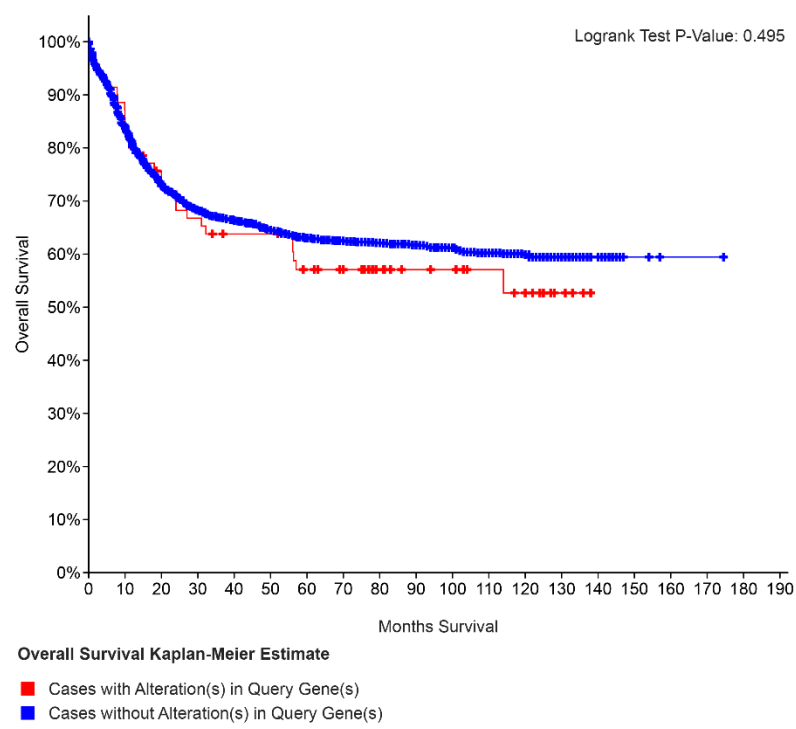

(d)

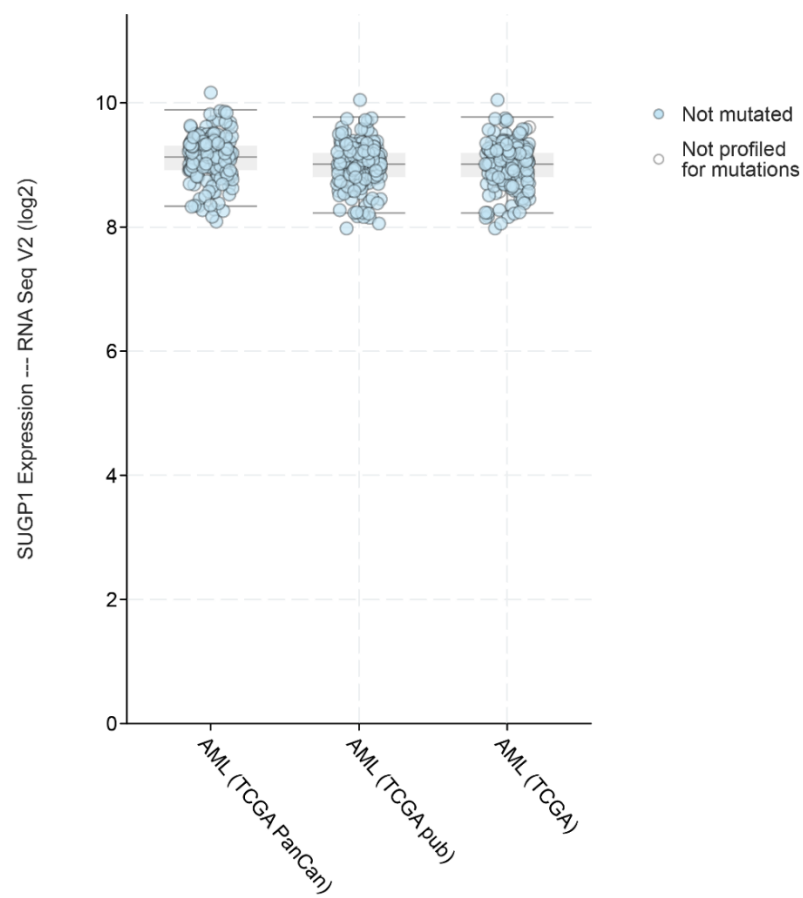

(e)

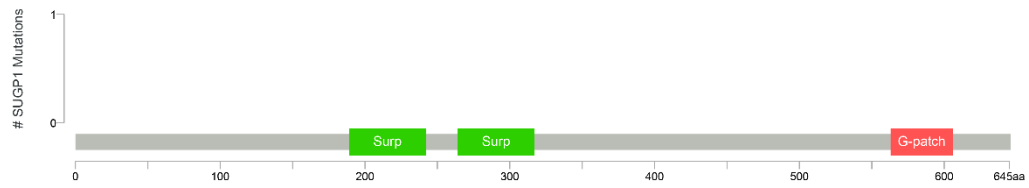

**Figure S13.** Genetic alterations of the hub genes were analyzed using the cBioPortal. (a) Genetic alterations of the hub genes were analyzed using cBioPortal. Grey bars along a vertical line represent the same sample interrogated for amplification (red), deep deletion (blue), missense mutation (green), truncating mutation (black) or in-frame mutation (brown). (b) The alteration frequency of an 8-gene signature (*SUGP1*, *DHX16*, *FUS*, *HNRNPR*, *DHX15*, *NAA38*, *SKIV2L2* and *PLRG1*) was determined using the cBioPortal (<http://www.cbioportal.org>). (c) Overall Survival Kaplan–Meier estimate. (d) Relative expression level as a function of relative copy number of *SUGP1* gene was plotted in different database. (e) The distribution of *SUGP1* mutations in leukemia across protein domains.

(a)

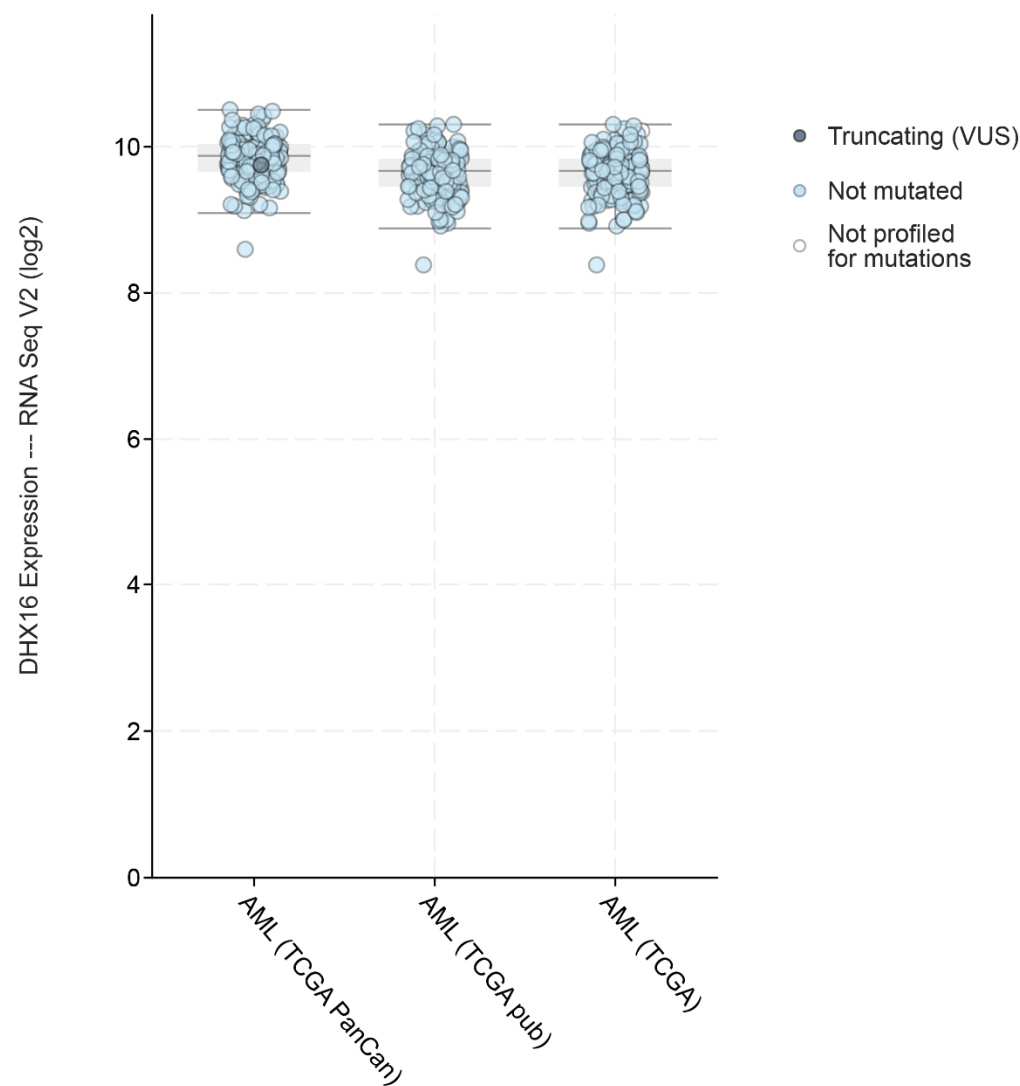

(b)

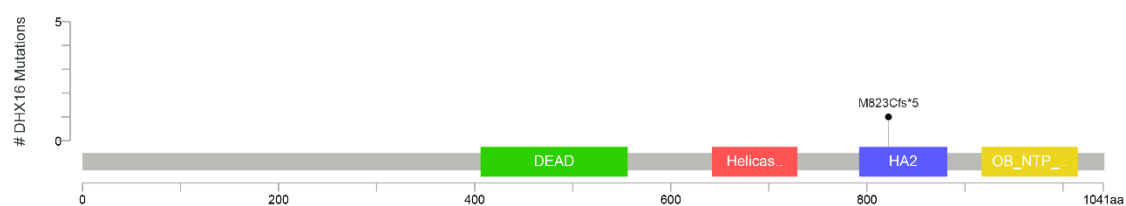

**Figure S14.** The alterations of *DHX16* gene in cBioportal Web resource online. (a) Relative expression level as a function of relative copy number of *DHX16* gene was plotted in different database. (b) The distribution of *DHX16* mutations in leukemia across protein domains.

(a)

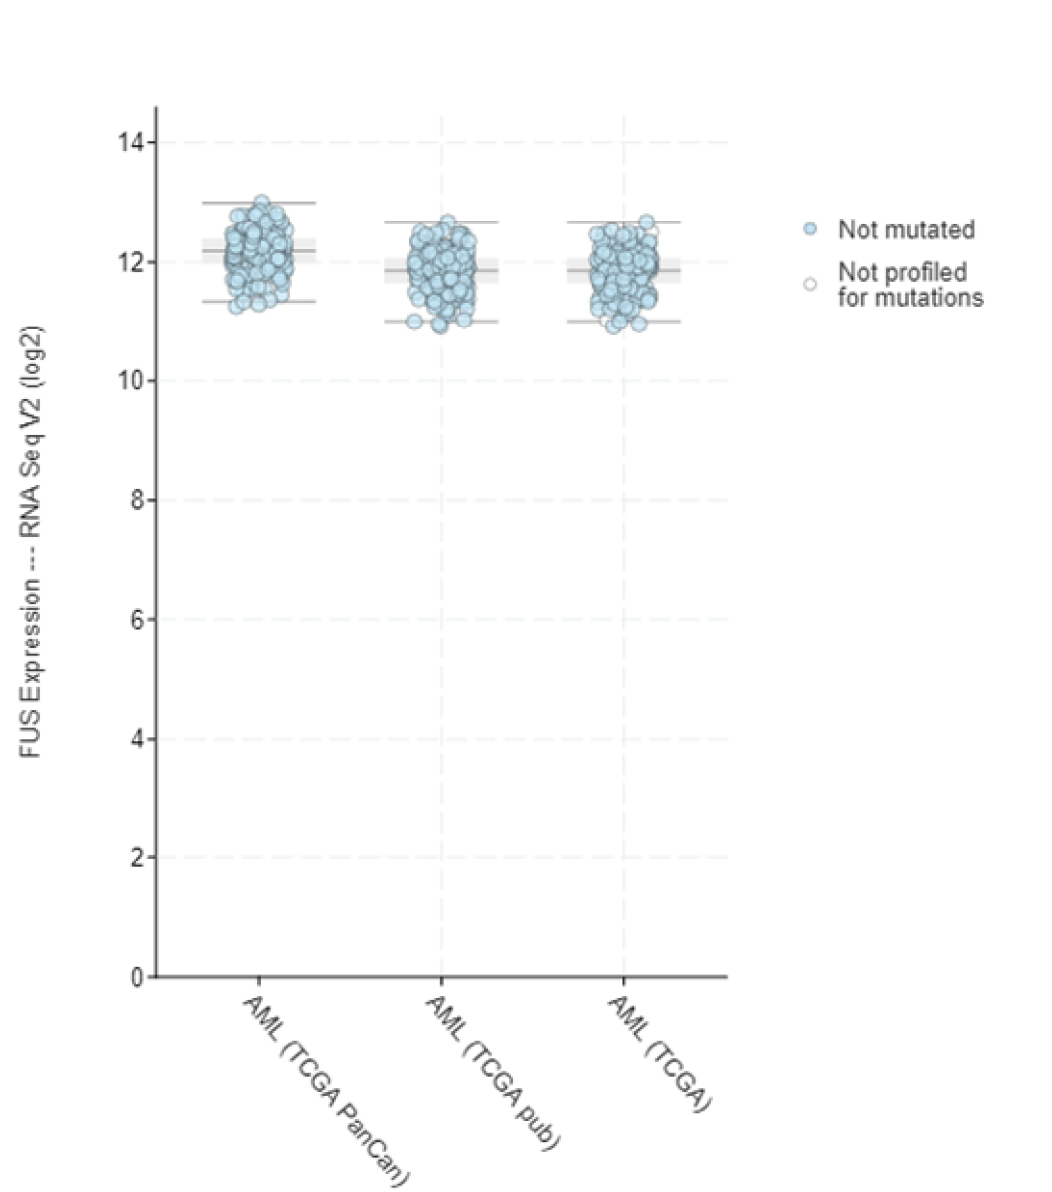

(b)

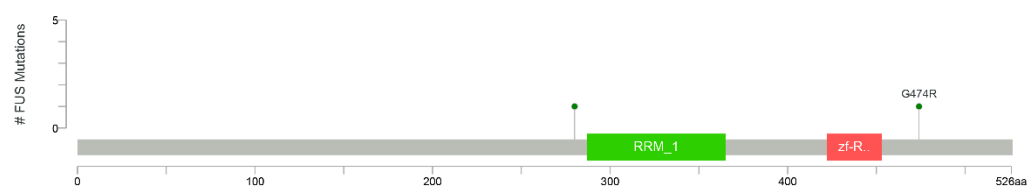

**Figure S15. The alterations of *FUS* gene in cBioportal Web resource online.** (a) Relative expression level as a function of relative copy number of *FUS* gene was plotted in different database. (b) The distribution of *FUS* mutations in leukemia across protein domains.

(a)

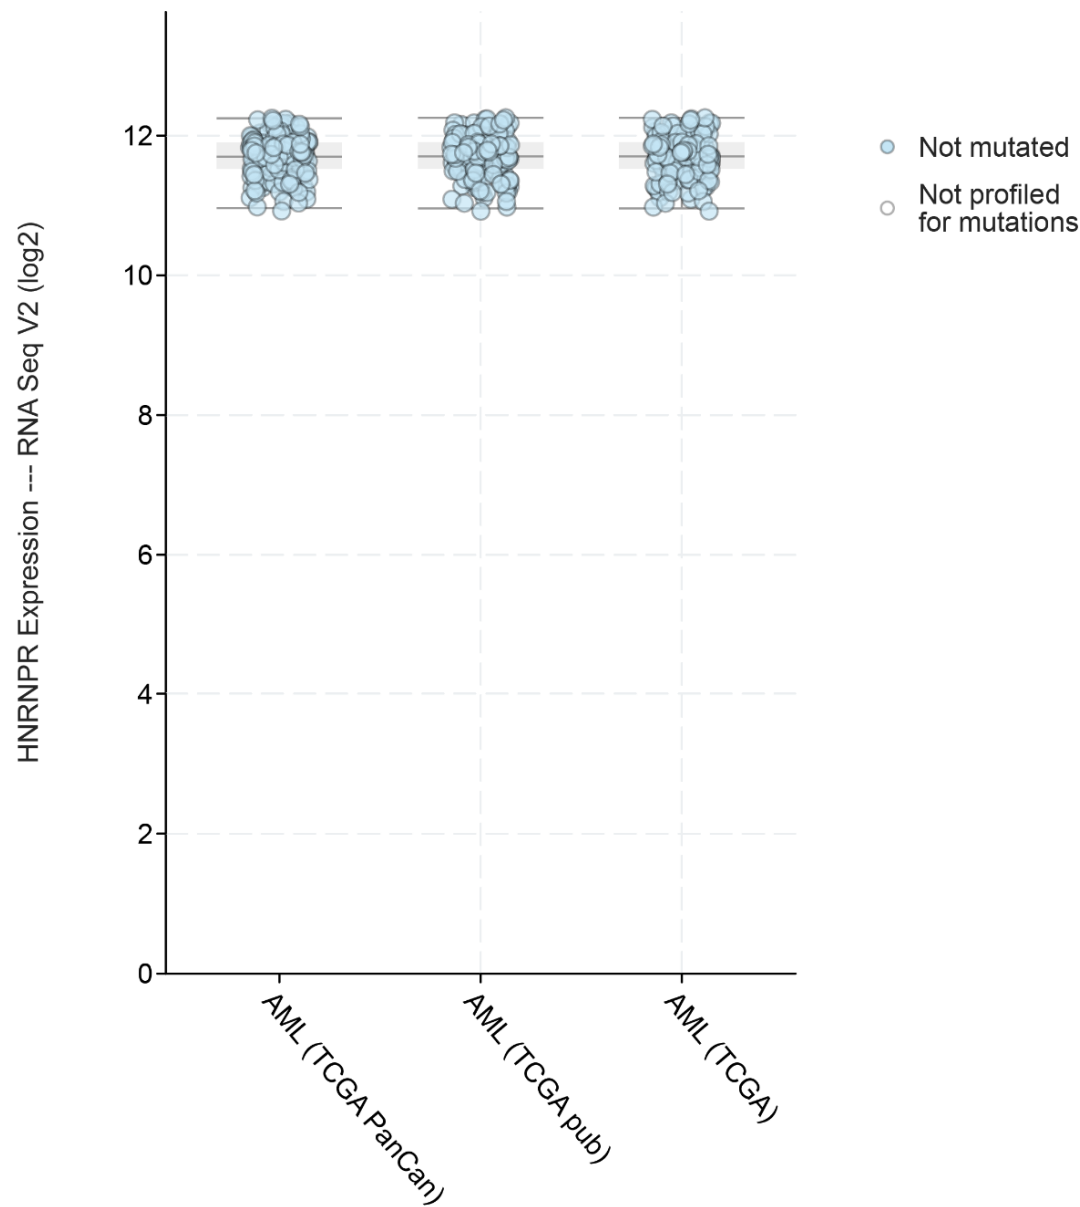

(b)

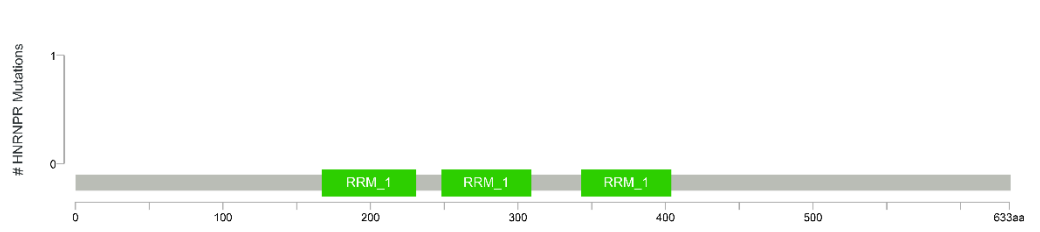

**Figure S16.** The alterations of *HNRNPR* gene in cBioportal Web resource online. (a) Relative expression level as a function of relative copy number of *HNRNPR* gene was plotted in different database. (b) The distribution of *HNRNPR* mutations in leukemia across protein domains.

(a)

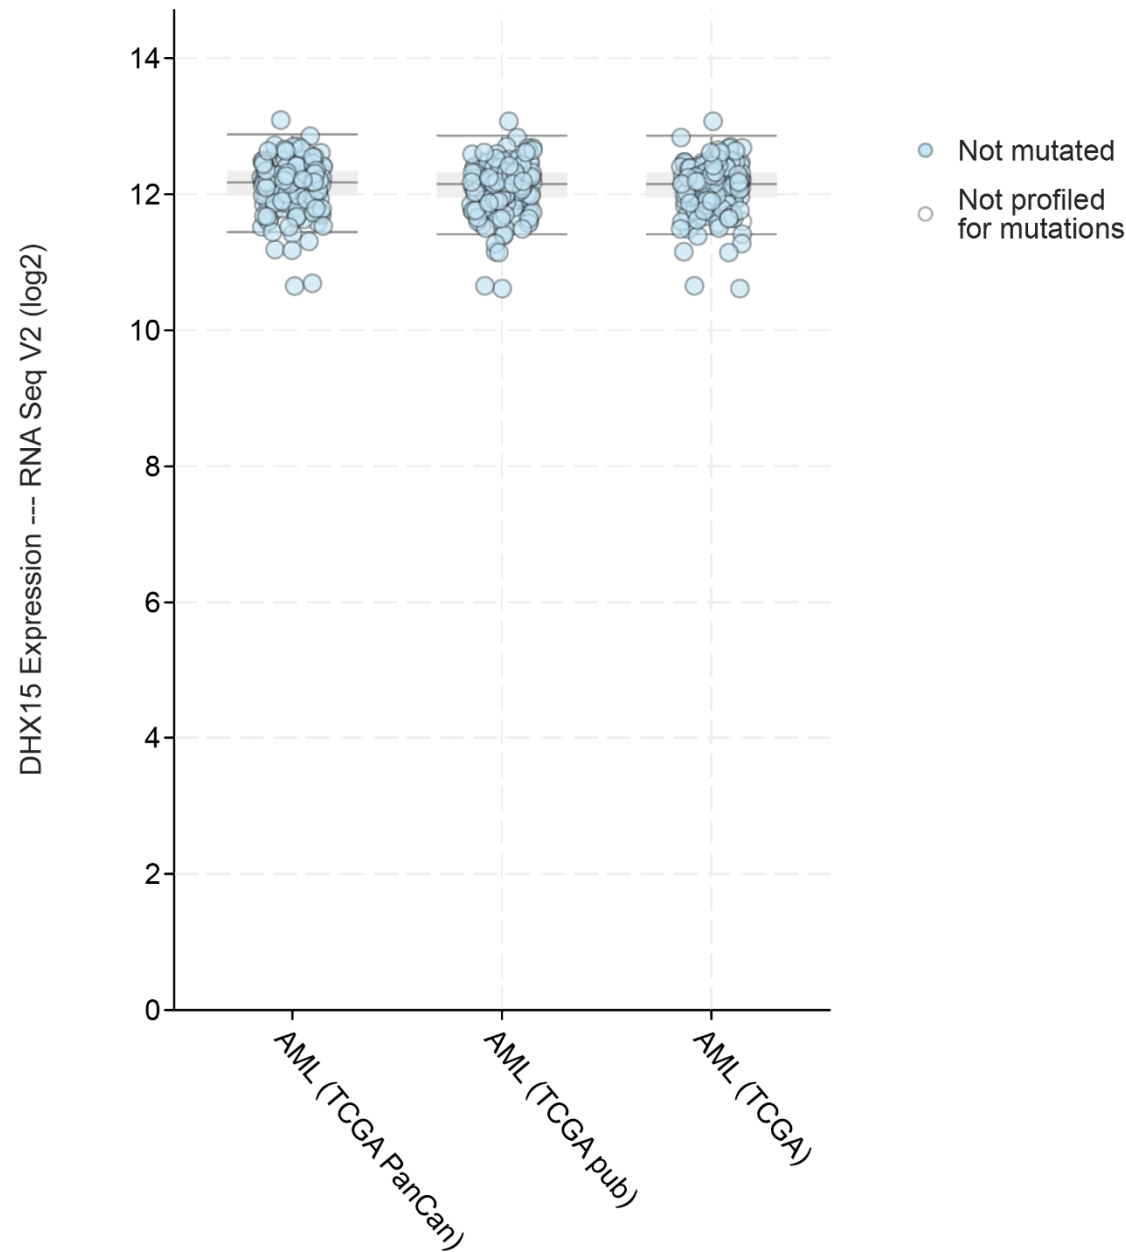

(b)

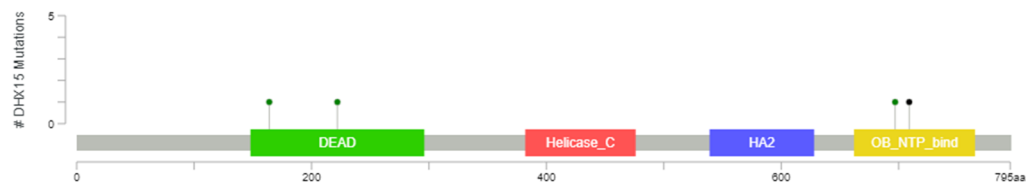

**Figure S17. The alterations of *DHX15* gene in cBioportal Web resource online.** (a) Relative expression level as a function of relative copy number of *DHX15* gene was plotted in different database. (b) The distribution of *DHX15* mutations in leukemia across protein domains.

(a)

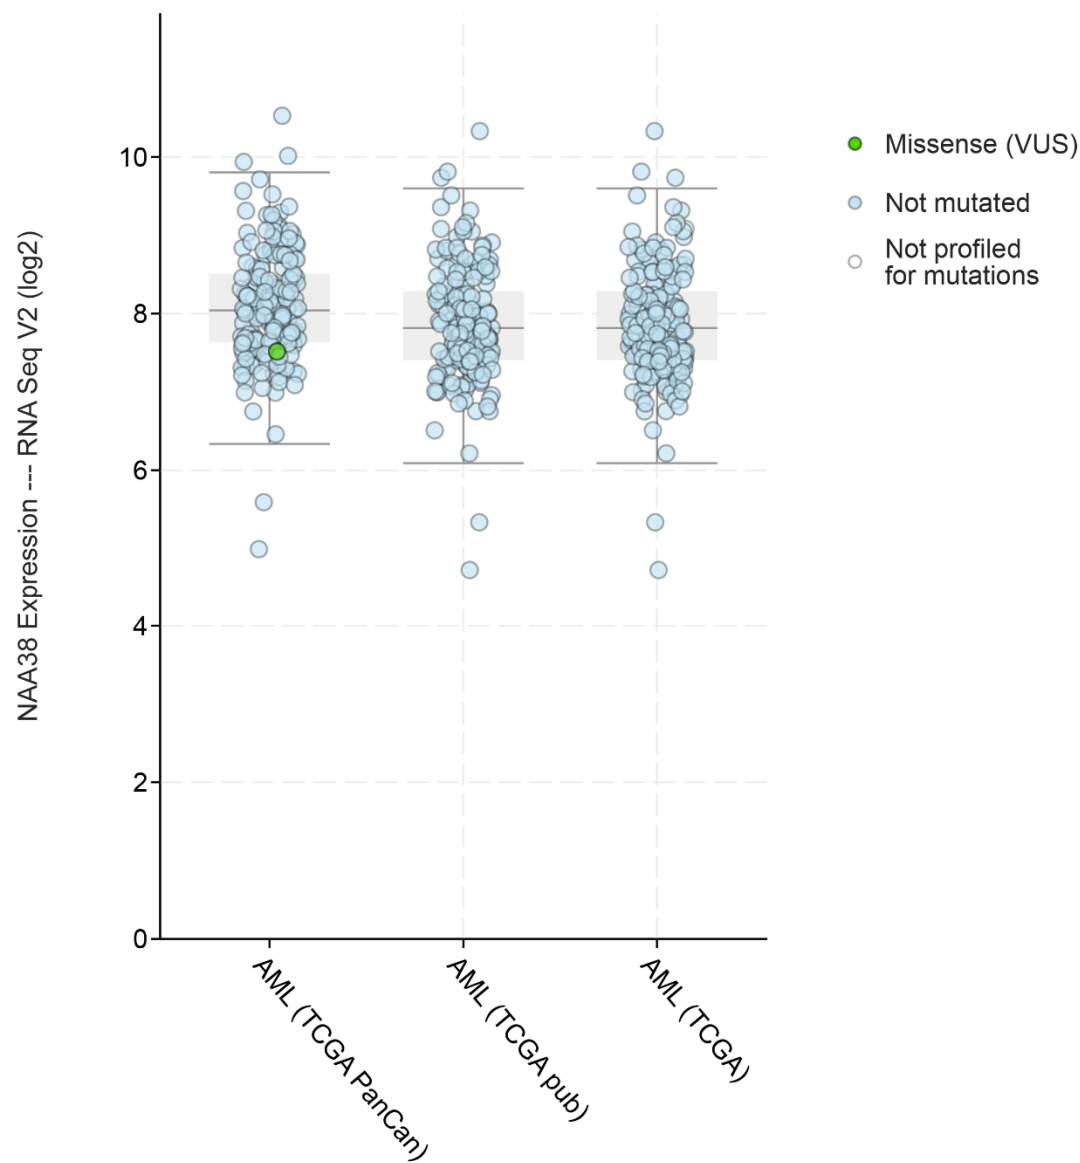

(b)

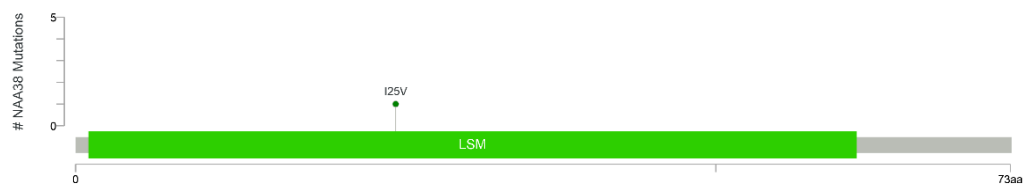

**Figure S18.** The alterations of *NAA38* gene in cBioportal Web resource online. (a) Relative expression level as a function of relative copy number of *NAA38* gene was plotted in different database. (b) The distribution of *NAA38* mutations in leukemia across protein domains.

(a)

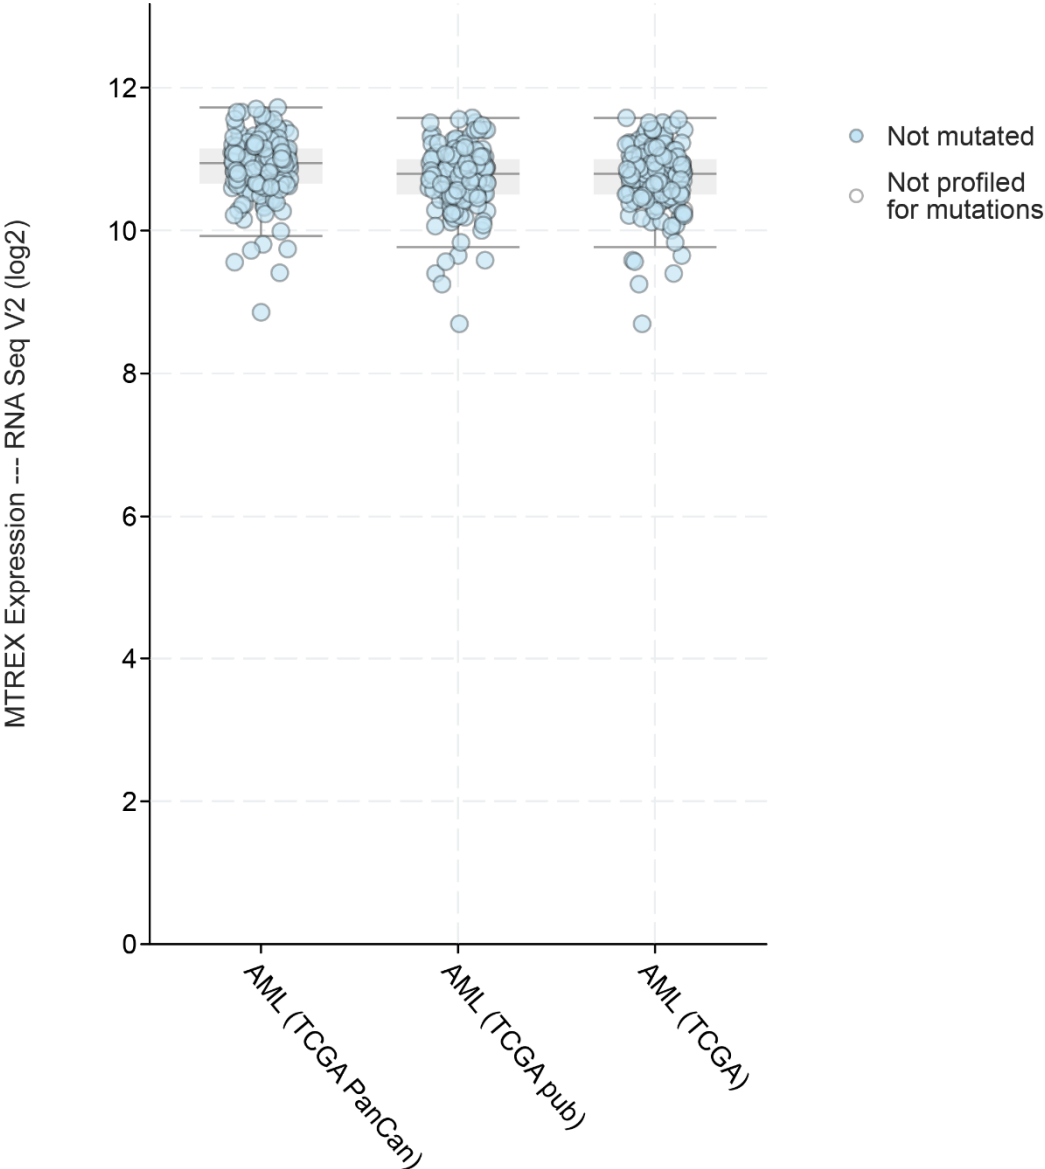

(b)

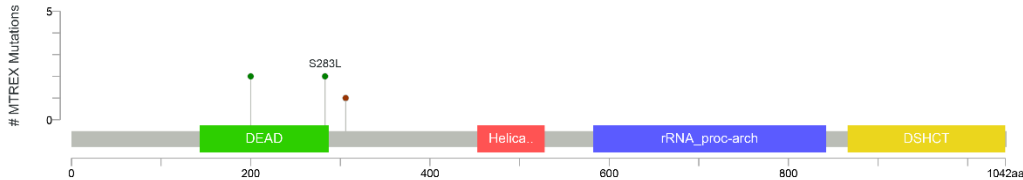

**Figure S19.** The alterations of *SKIV2L2* gene in cBioportal Web resource online. (a) Relative expression level as a function of relative copy number of *SKIV2L2* (*MTREX*) gene was plotted in different database. (b) The distribution of *SKIV2L2* (*MTREX*) mutations in leukemia across protein domains.

(a)

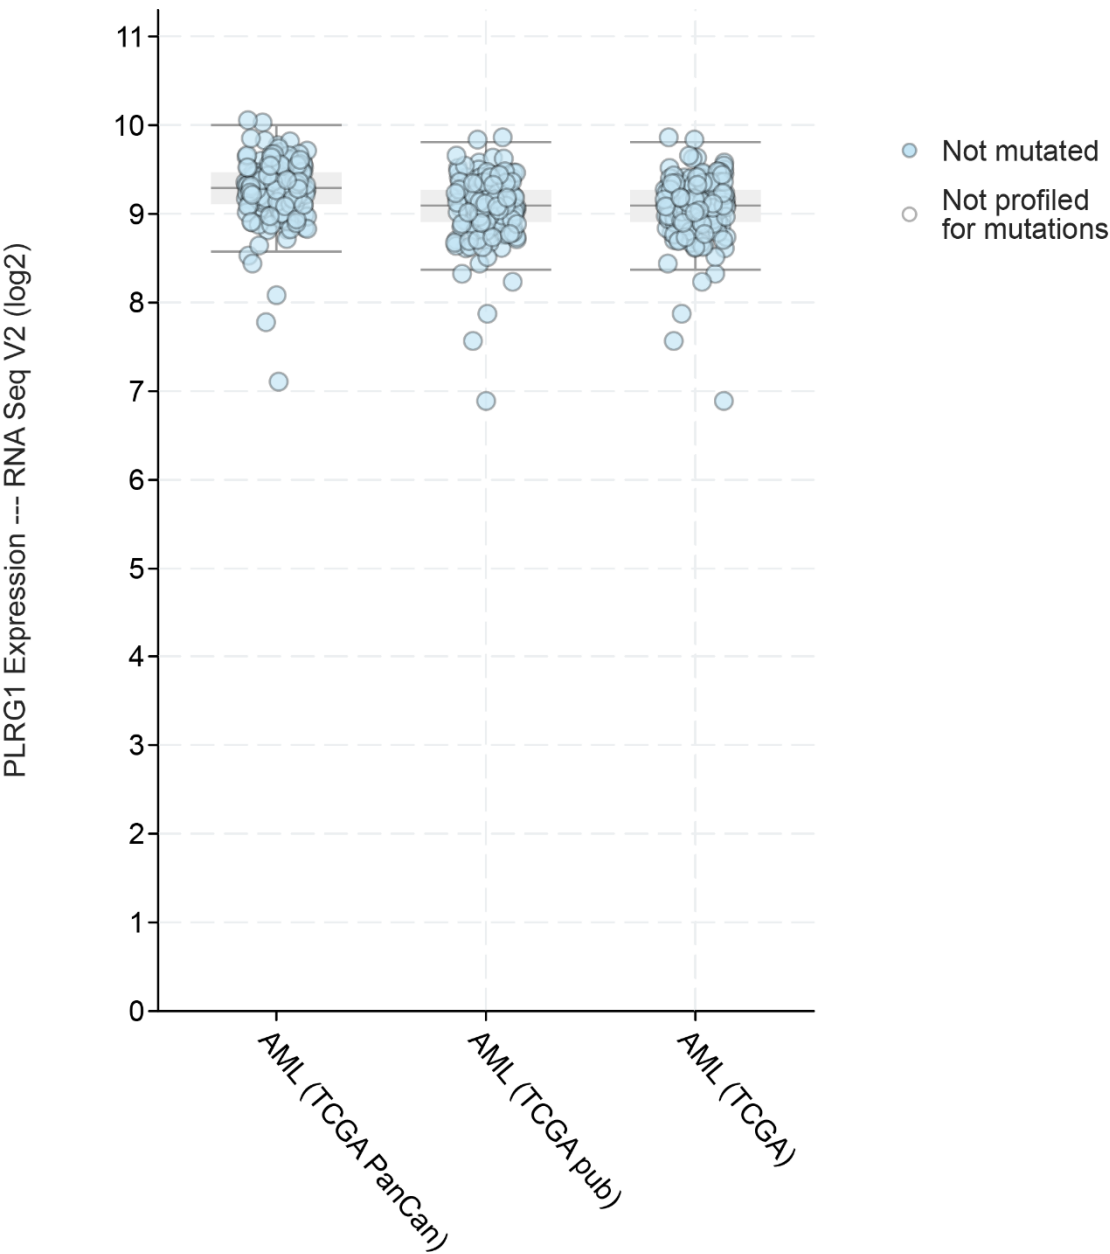

(b)

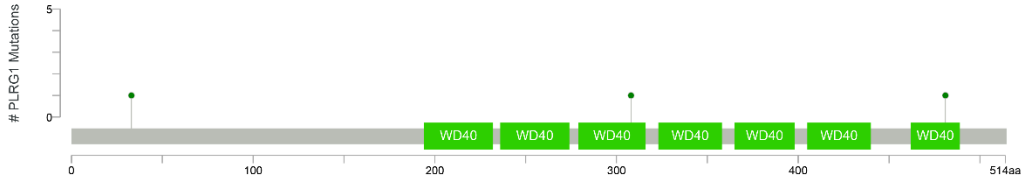

**Figure S20. The alterations of *PLRG1* gene in cBioportal Web resource online.** (a) Relative expression level as a function of relative copy number of *PLRG1* gene was plotted in different database. (b) The distribution of *PLRG1* mutations in leukemia across protein domains.

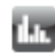

### HNRNPR Expression in Andersson Leukemia T-Cell Acute Lymphoblastic Leukemia vs. Normal

#### Andersson Leukemia Statistics

Over-expression Gene Rank: 547 (in top 6%)

P-value: 5.96E-7

Reporter: IMAGE:842861 ▼

t-Test: 8.381

Fold Change: 2.316

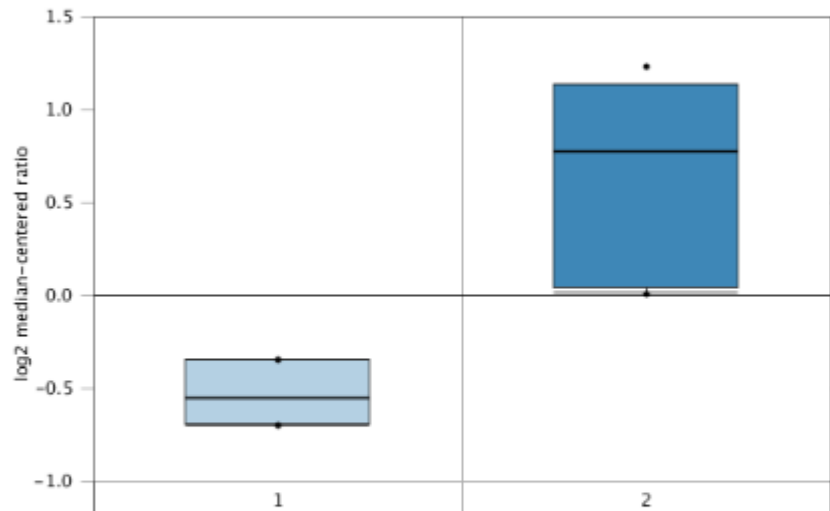

#### Legend

1. Bone Marrow (6)
2. T-Cell Acute Lymphoblastic Leukemia (11)

#### Andersson Leukemia

Leukemia 2007/06/01

127 samples

[HNRNPR  
Information  
Reporter  
Information](#)

mRNA

10,735 measured genes

Platform not pre-defined  
in OncoPrint

**Figure S21.** Comparison of the expression of *HNRNPR* in the Valk Leukemia database using OncoPrint.

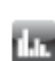

## DHX16 Expression in Valk Leukemia Grouped by Cancer Type

### Valk Leukemia Statistics

Reporter:

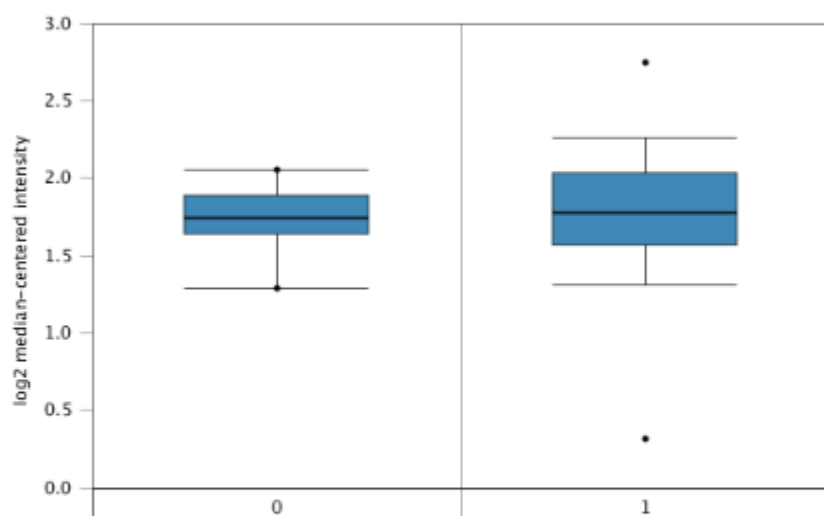

### Legend

0. No value (8)

1. Acute Myeloid Leukemia (285)

### Valk Leukemia

N Engl J Med 2004/04/15 293 samples

mRNA 12,624 measured genes

Human Genome U133A  
Array

DHX16  
Information  
Reporter  
Information

**Figure S22.** Comparison of the expression of *DHX16* in the Valk Leukemia database using OncoPrint.

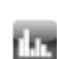

## FUS Expression in Valk Leukemia Grouped by Cancer Type

### Valk Leukemia Statistics

Reporter:

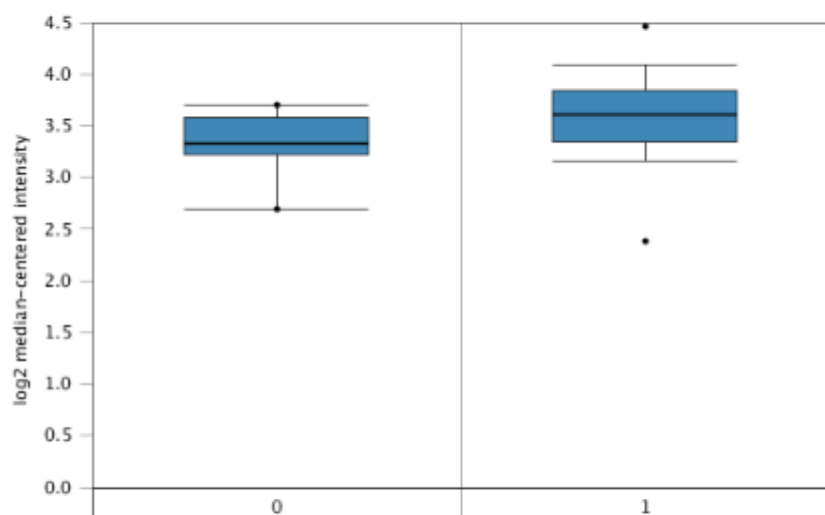

### Legend

0. No value (8)

1. Acute Myeloid Leukemia (285)

### Valk Leukemia

N Engl J Med 2004/04/15  
mRNA

293 samples  
12,624 measured genes

Human Genome U133A  
Array

[FUS Information](#)  
[Reporter](#)  
[Information](#)

**Figure S23.** Comparison of the expression of *FUS* in the Valk Leukemia database using OncoPrint.

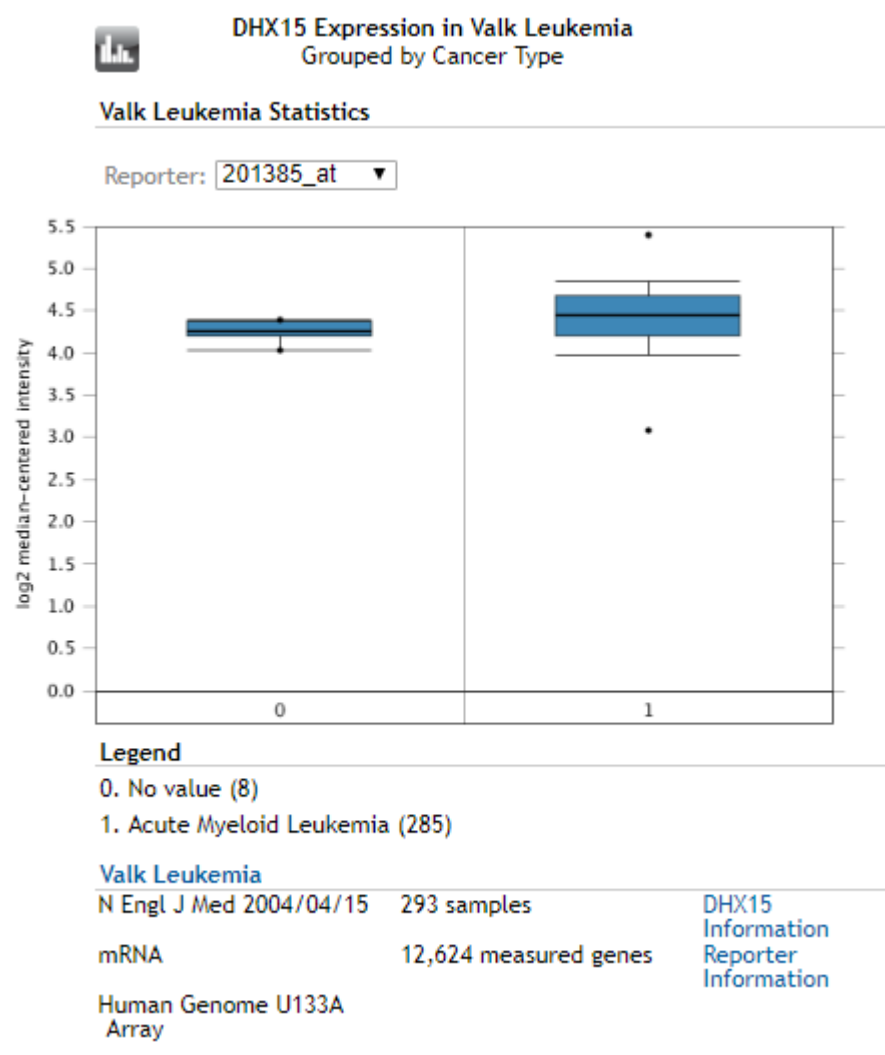

**Figure S24.** Comparison of the expression of *DHX15* in the Valk Leukemia database using Oncomine.

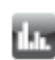

# NAA38 Expression in Valk Leukemia Grouped by Cancer Type

## Valk Leukemia Statistics

Reporter:

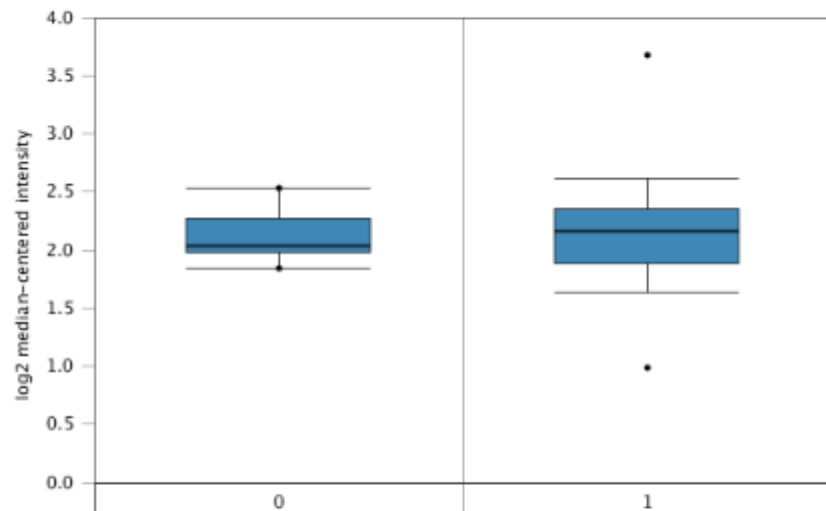

## Legend

0. No value (8)

1. Acute Myeloid Leukemia (285)

## Valk Leukemia

N Engl J Med 2004/04/15 293 samples

mRNA 12,624 measured genes

Human Genome U133A  
Array

NAA38  
Information  
Reporter  
Information

**Figure S25.** Comparison of the expression of *NAA38* in the Valk Leukemia database using OncoPrint.

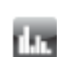

# SKIV2L2 Expression in Valk Leukemia Grouped by Cancer Type

## Valk Leukemia Statistics

Reporter: 212896\_at ▼

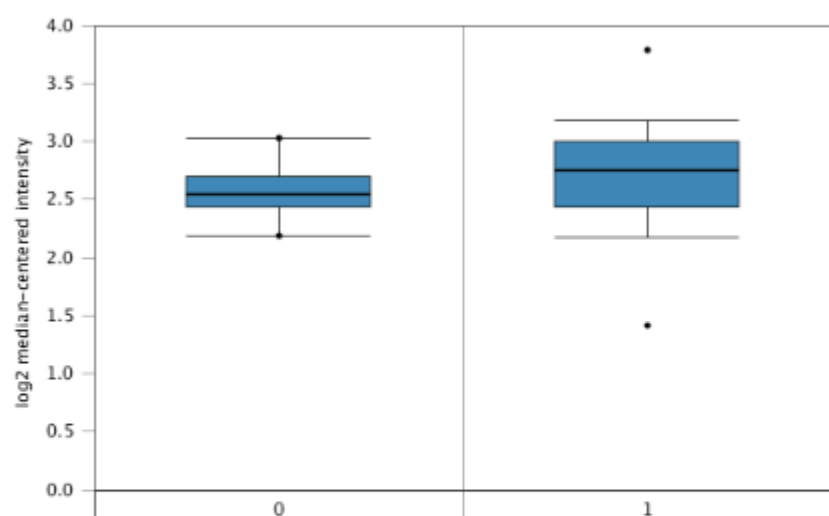

### Legend

0. No value (8)

1. Acute Myeloid Leukemia (285)

### Valk Leukemia

N Engl J Med 2004/04/15 293 samples

mRNA

12,624 measured genes

Human Genome U133A  
Array

[SKIV2L2  
Information  
Reporter  
Information](#)

**Figure S26.** Comparison of the expression of *SKIV212* in the Valk Leukemia database using Oncomine.

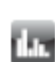

## PLRG1 Expression in Haslinger Leukemia Grouped by Cancer Type

### Haslinger Leukemia Statistics

Reporter: 34149\_at ▼

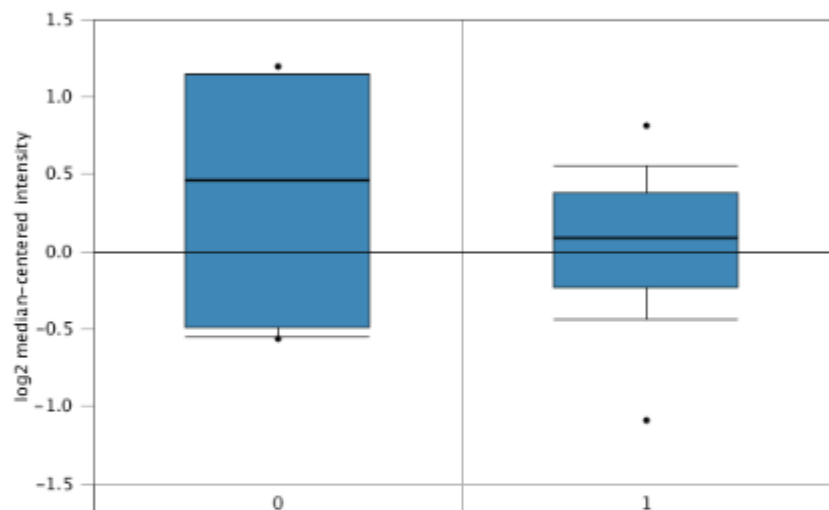

### Legend

- 0. No value (11)
- 1. Chronic Lymphocytic Leukemia (100)

### Haslinger Leukemia

|                                |                      |                                                 |
|--------------------------------|----------------------|-------------------------------------------------|
| J Clin Oncol 2004/10/01        | 111 samples          | PLRG1<br>Information<br>Reporter<br>Information |
| mRNA                           | 8,603 measured genes |                                                 |
| Human Genome U95A-Av2<br>Array |                      |                                                 |

**Figure S27.** Comparison of the expression of *PLRG1* in the Haslinger Leukemia database using OncoPrint.

(a)

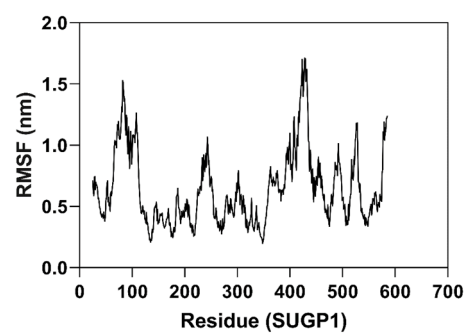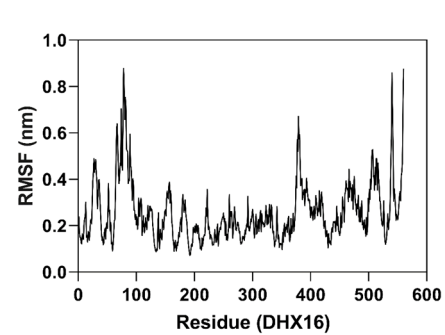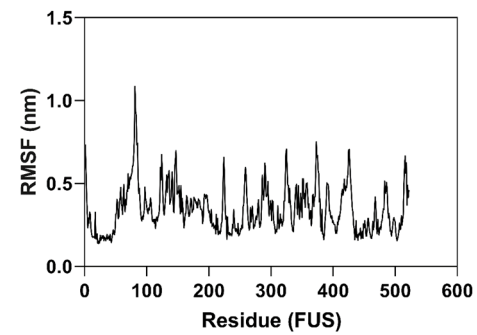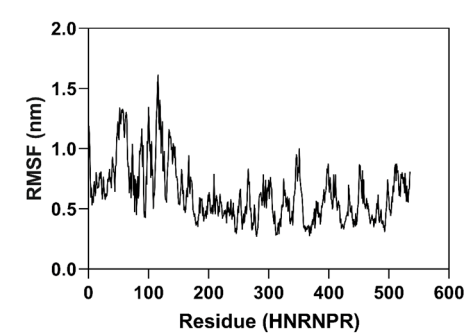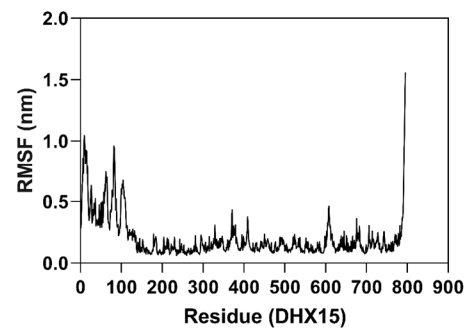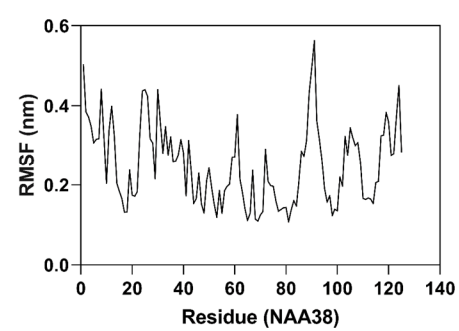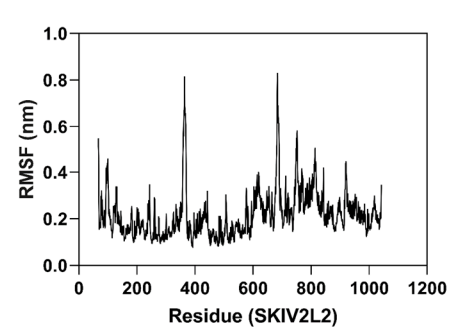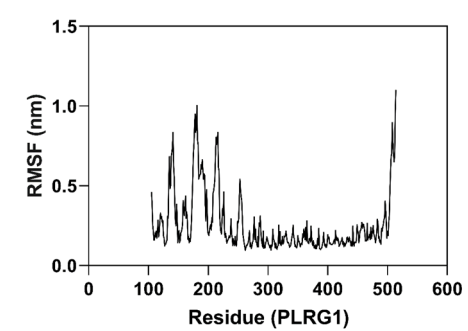

(b)

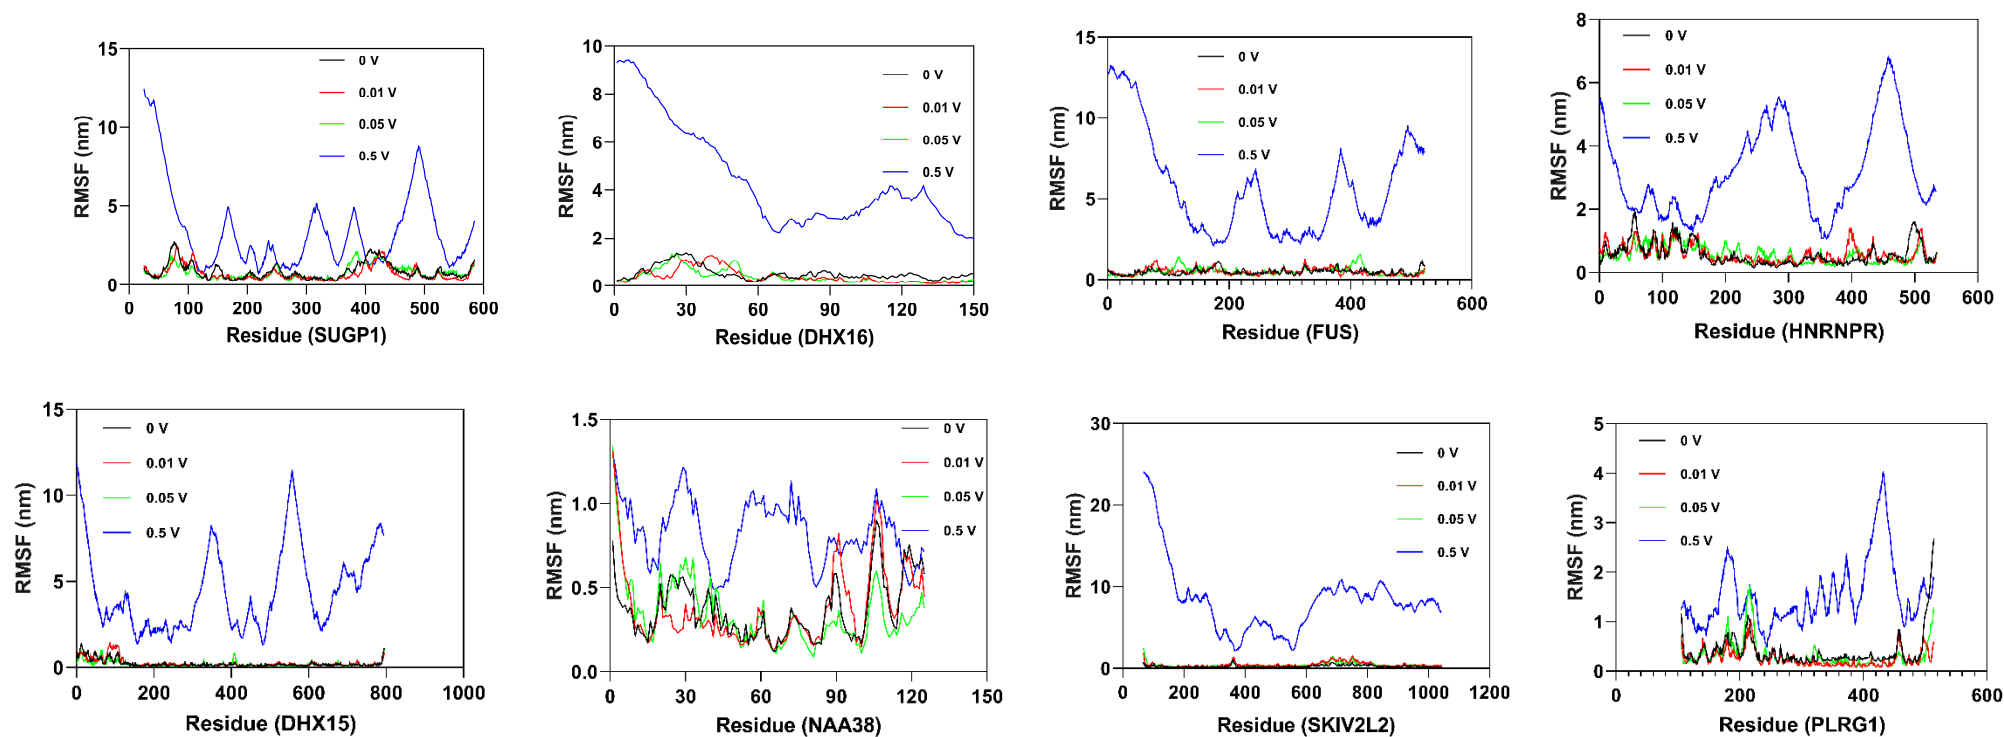

**Figure S28.** RMSF comparison plots of hub proteins during molecular dynamics simulation (at least > 100 ns). (a) The RMSF of each hub proteins under MD of “protein in water”. (b) The RMSF of selected hub proteins under MD of “protein under nsPEFs”. For each protein, 0v (black), 0.01v (red), 0.05v (green), and 0.5v (blue) are demonstrated on one map.

(a)

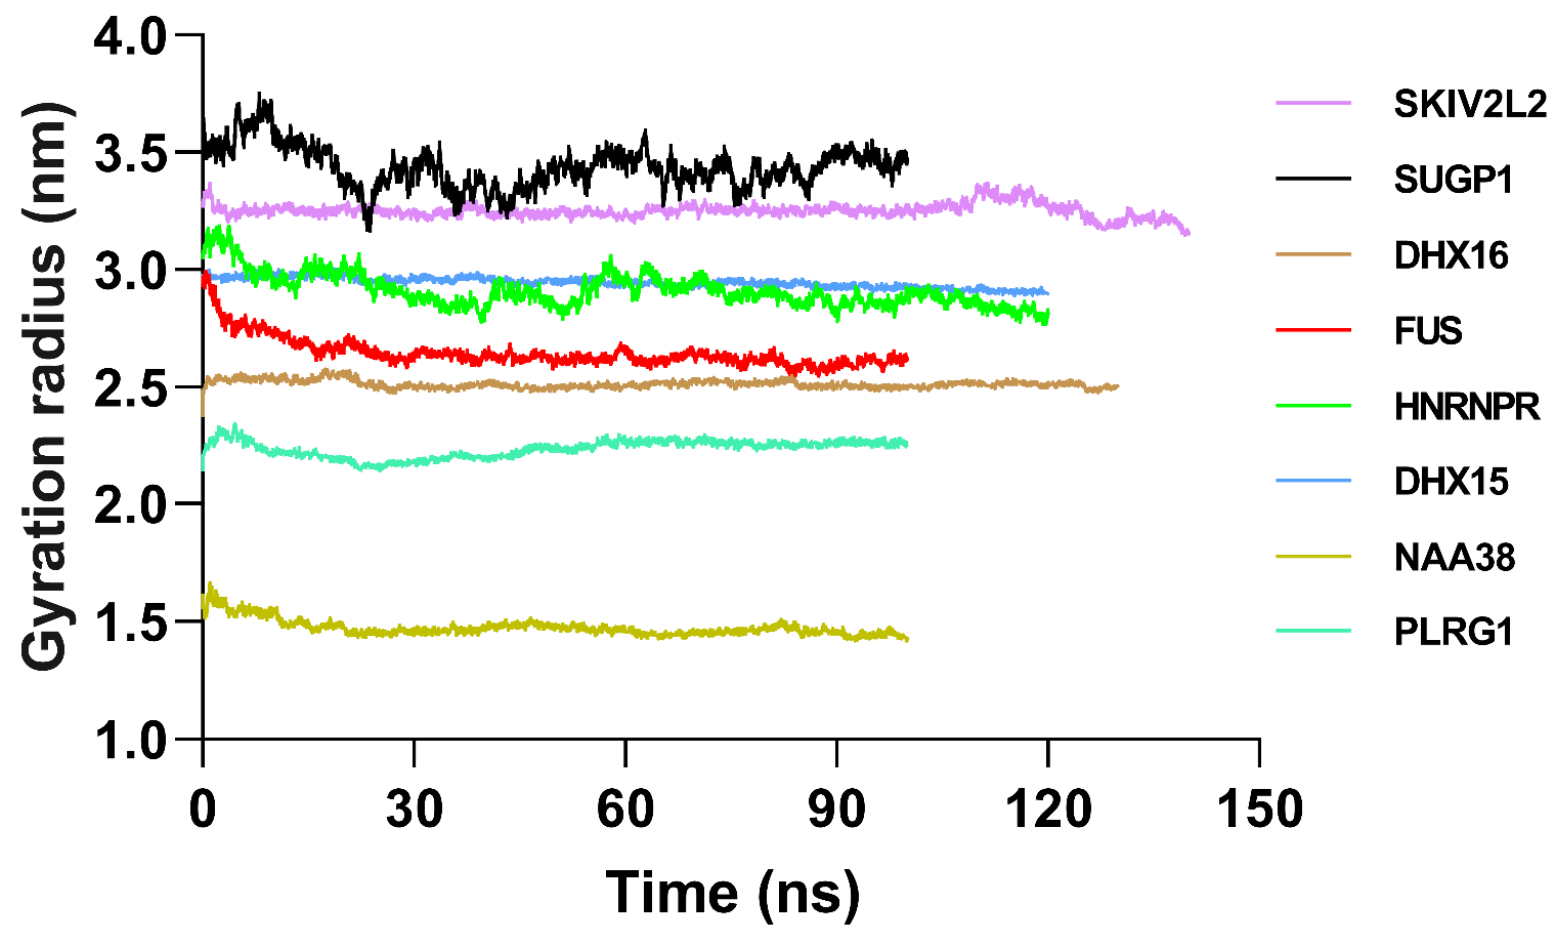

(b)

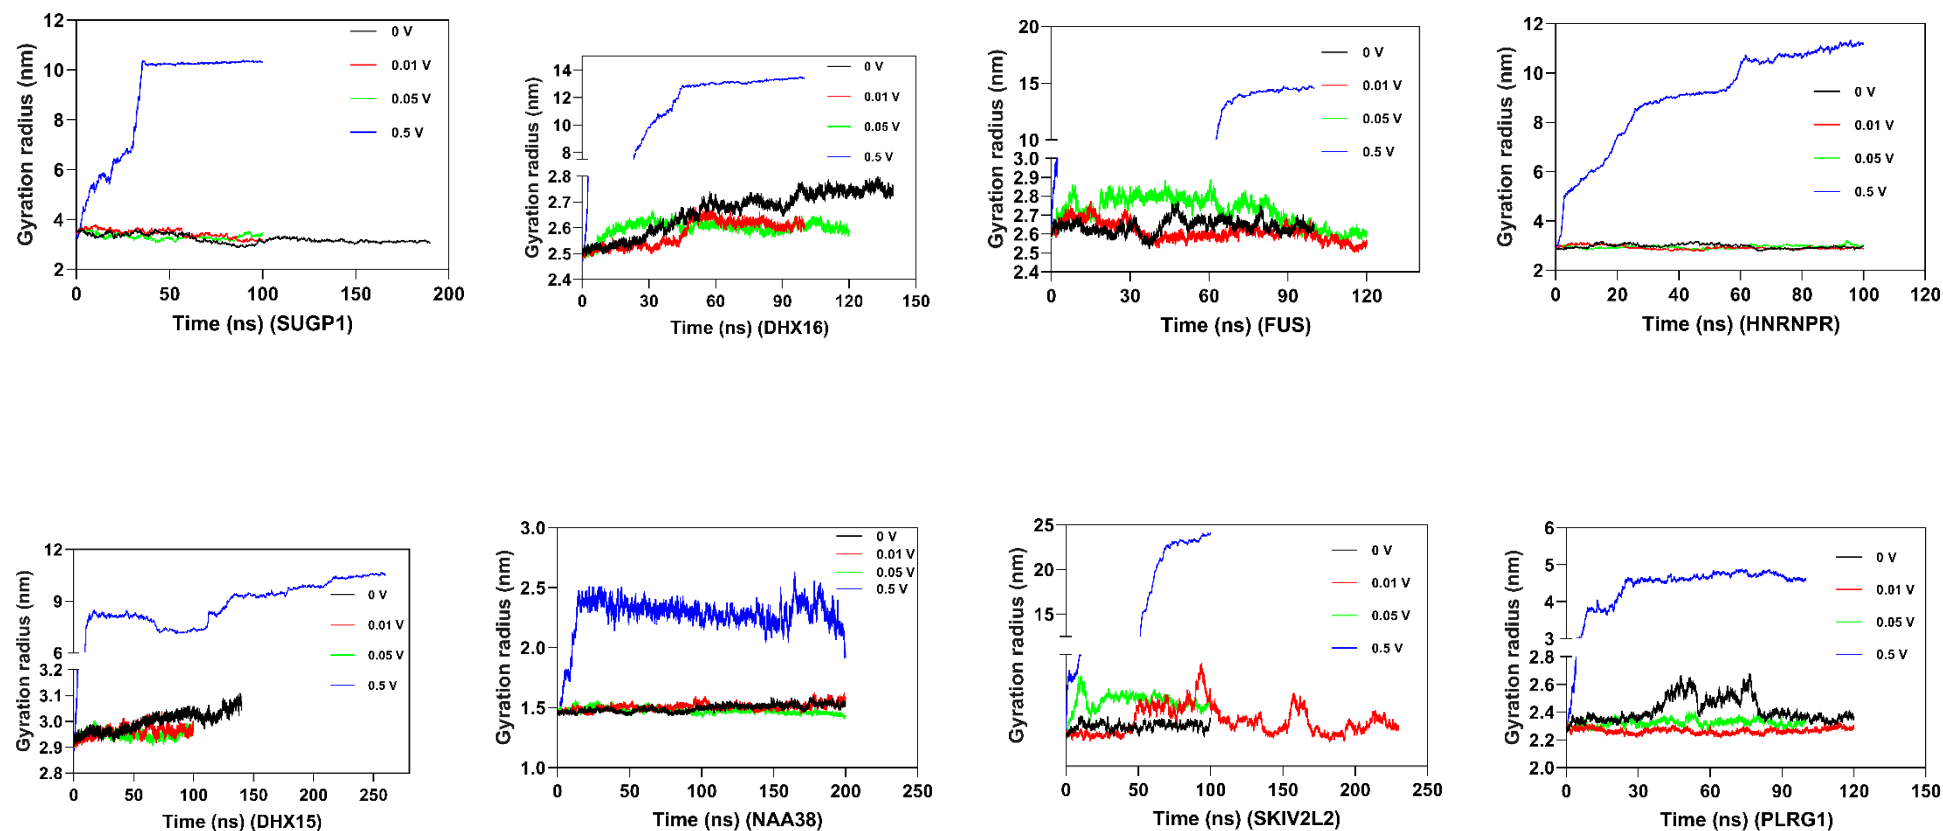

**Figure S29.** Gyration radius comparison plots of hub protein during molecular dynamics simulation (at least > 100 ns). (a) The gyration radius of each hub proteins under MD of “protein in water”. (b) The gyration radius of selected hub proteins under MD of “protein under nsPEFs”. For each protein, 0v (black), 0.01v (red), 0.05v (green), and 0.5v (blue) are demonstrated on one map.

a

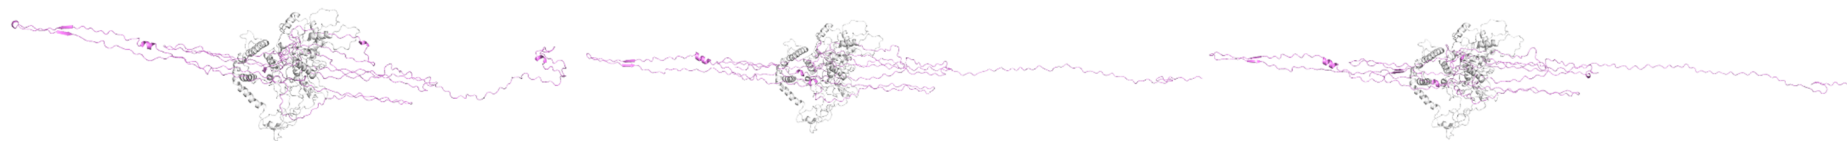

SUGP1\_alignment\_0.01\_0v

SUGP1\_alignment\_0.05\_0v

SUGP1\_alignment\_0.5\_0v

b

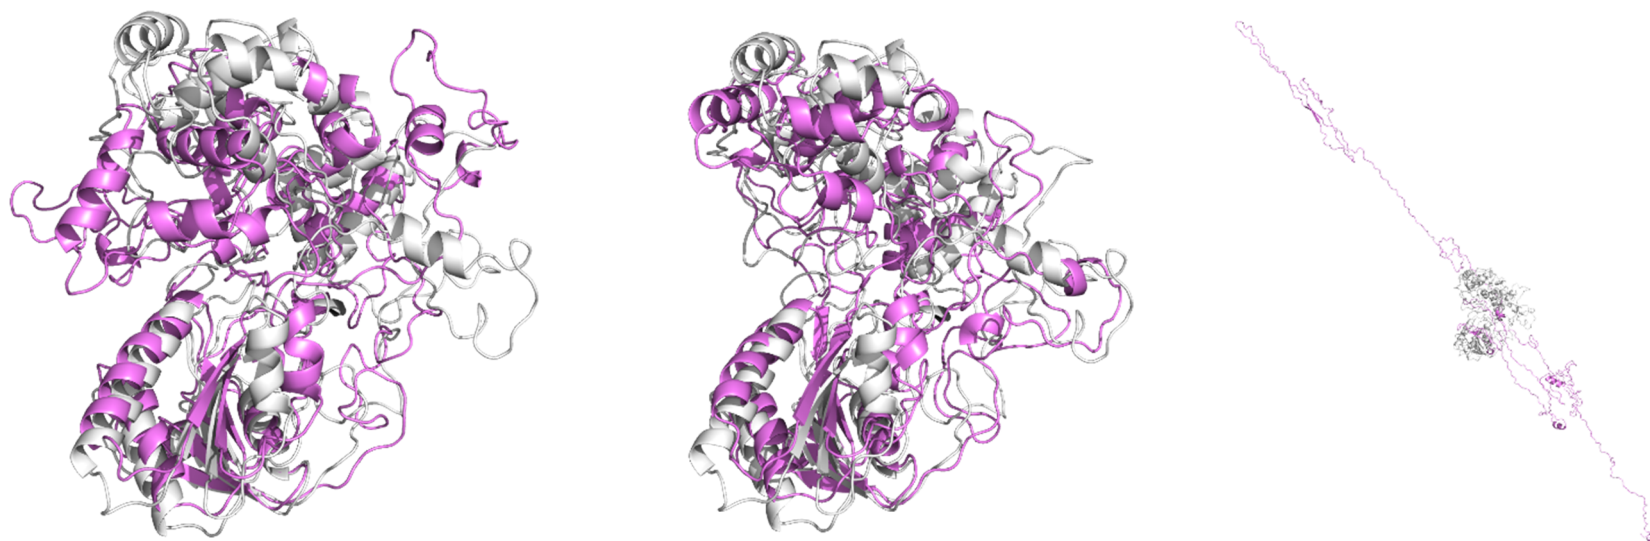

DHX16\_alignment\_0.01\_0v

DHX16\_alignment\_0.05\_0v

DHX16\_alignment\_0.5\_0v

c

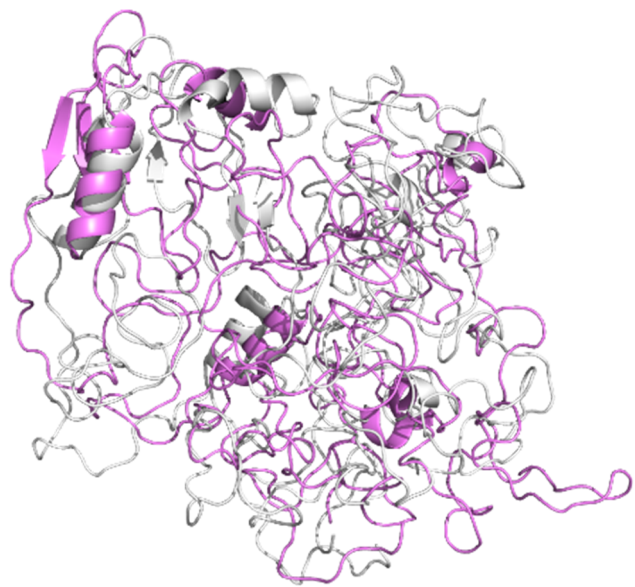

FUS\_alignment\_0.01\_0v

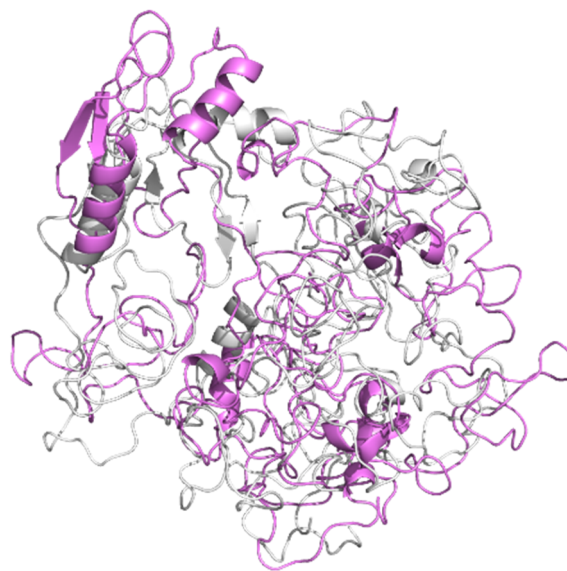

FUS\_alignment\_0.05\_0v

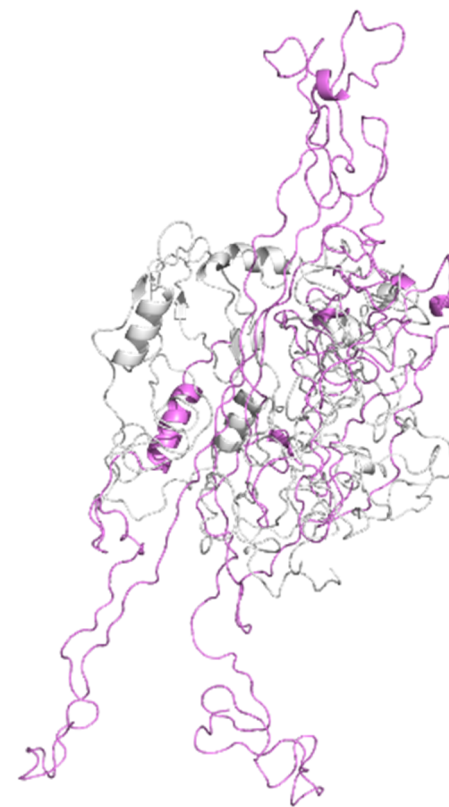

FUS\_alignment\_0.5\_0v

d

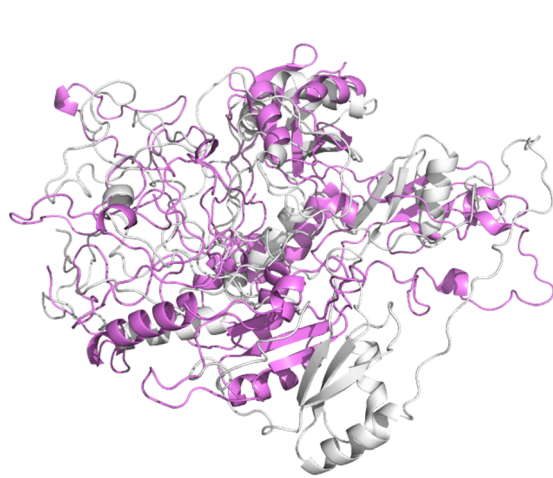

HNRNPR\_alignment\_0.01v\_0v

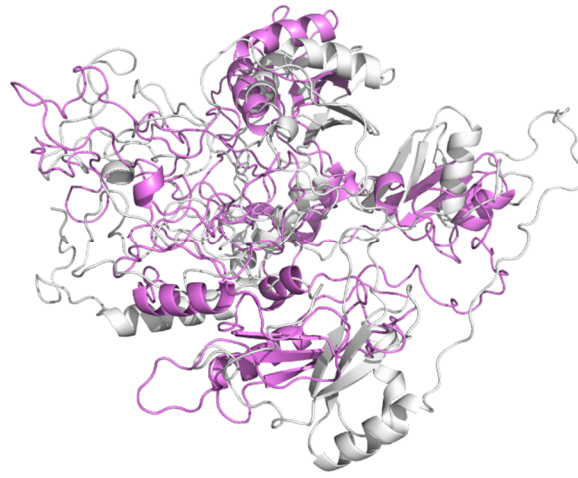

HNRNPR\_alignment\_0.05v\_0v

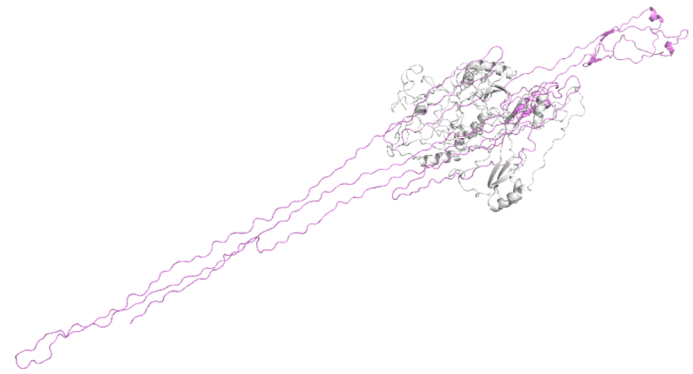

HNRNPR\_alignment\_0.5v\_0v

e

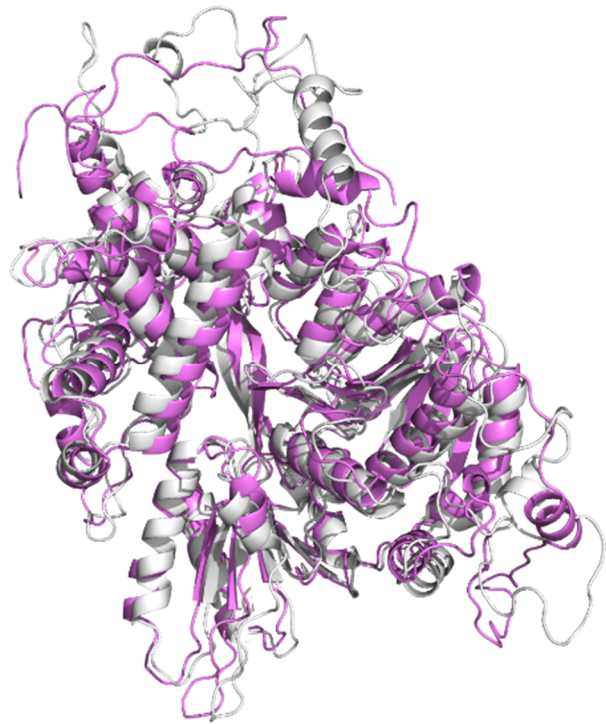

DHX15\_alignment\_0.01\_0v

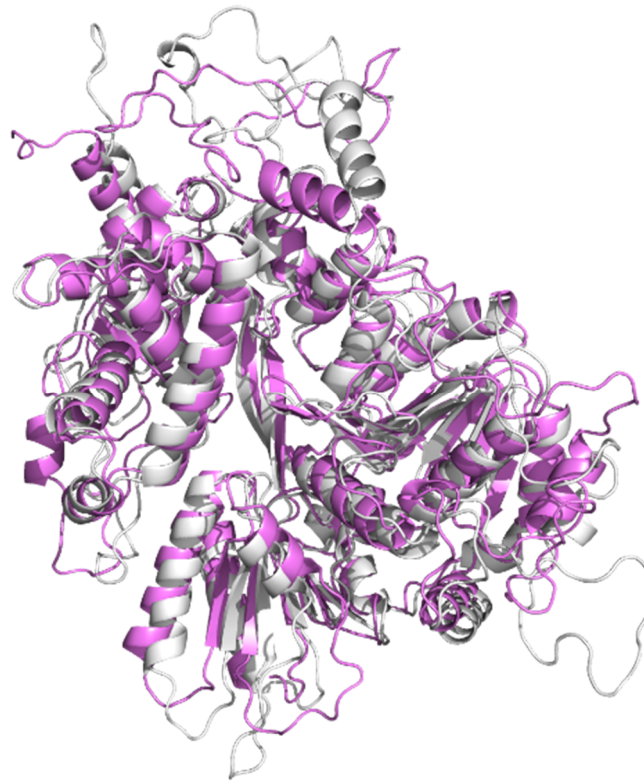

DHX15\_alignment\_0.05\_0v

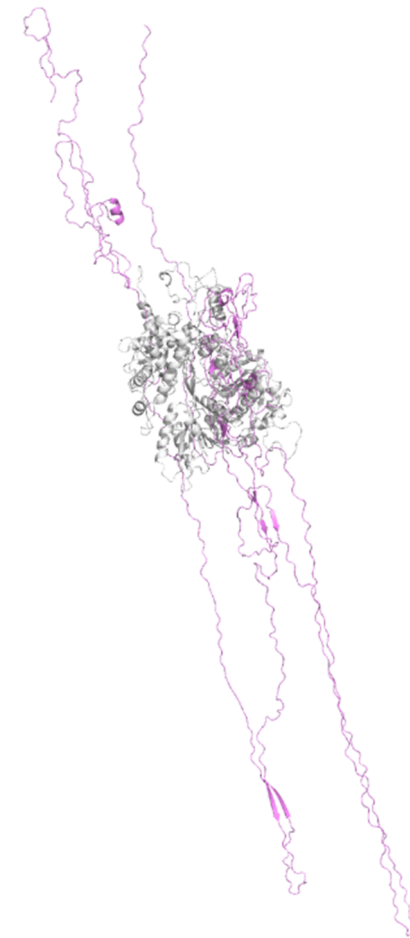

DHX15\_alignment\_0.5\_0v

f

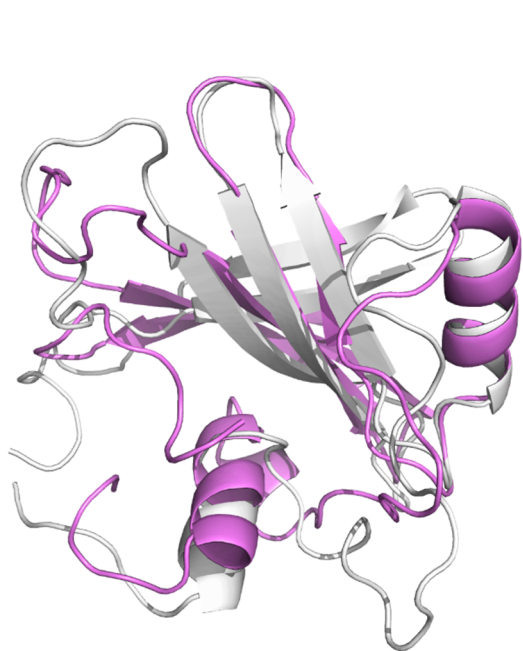

NAA38\_alignment\_0.01v\_0v

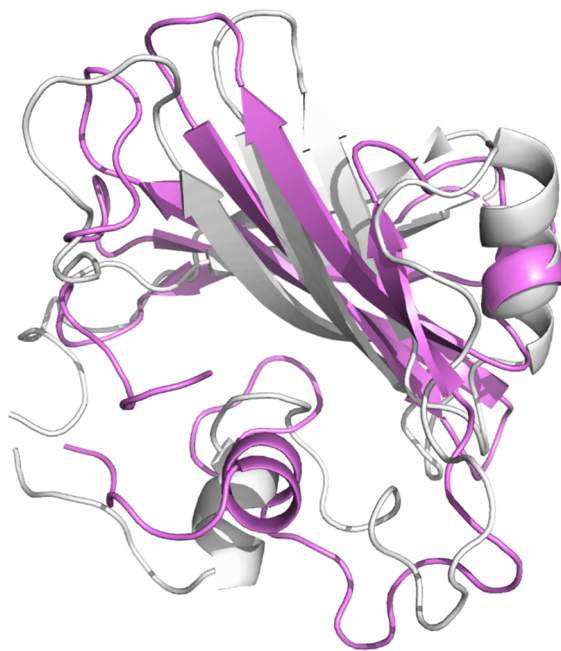

NAA38\_alignment\_0.05v\_0v

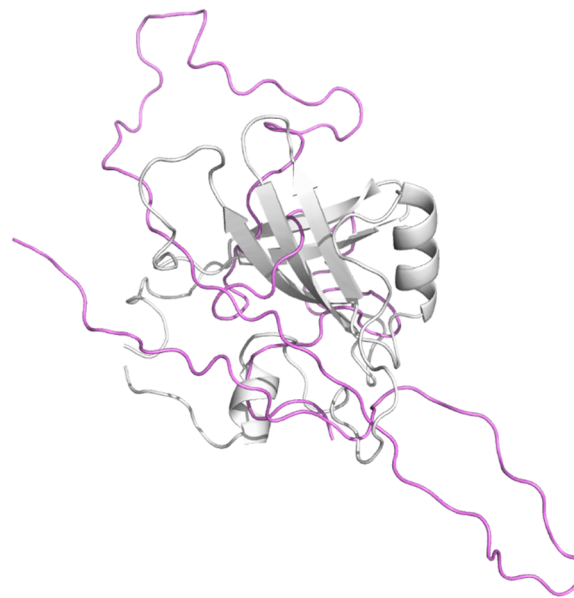

NAA38\_alignment\_0.5v\_0v

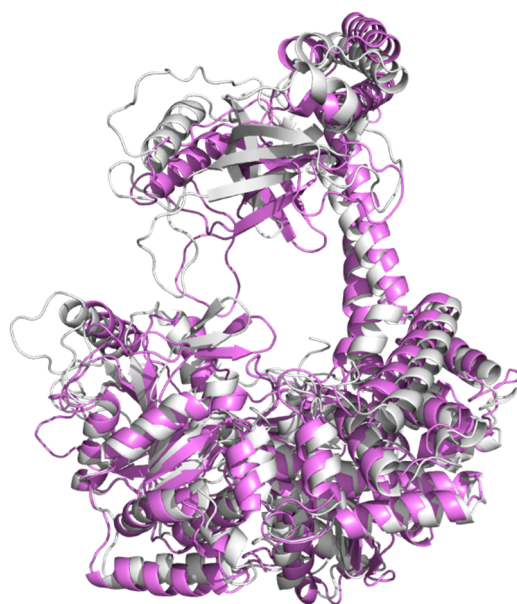

SKIV2L2\_alignment\_0.01v\_0v

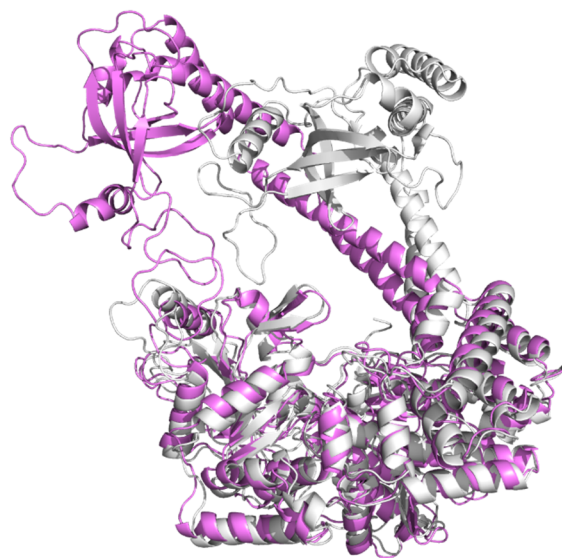

SKIV2L2\_alignment\_0.05v\_0v

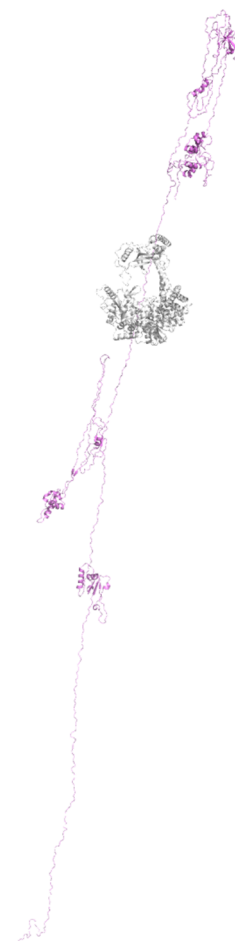

SKIV2L2\_alignment\_0.5v\_0v

h

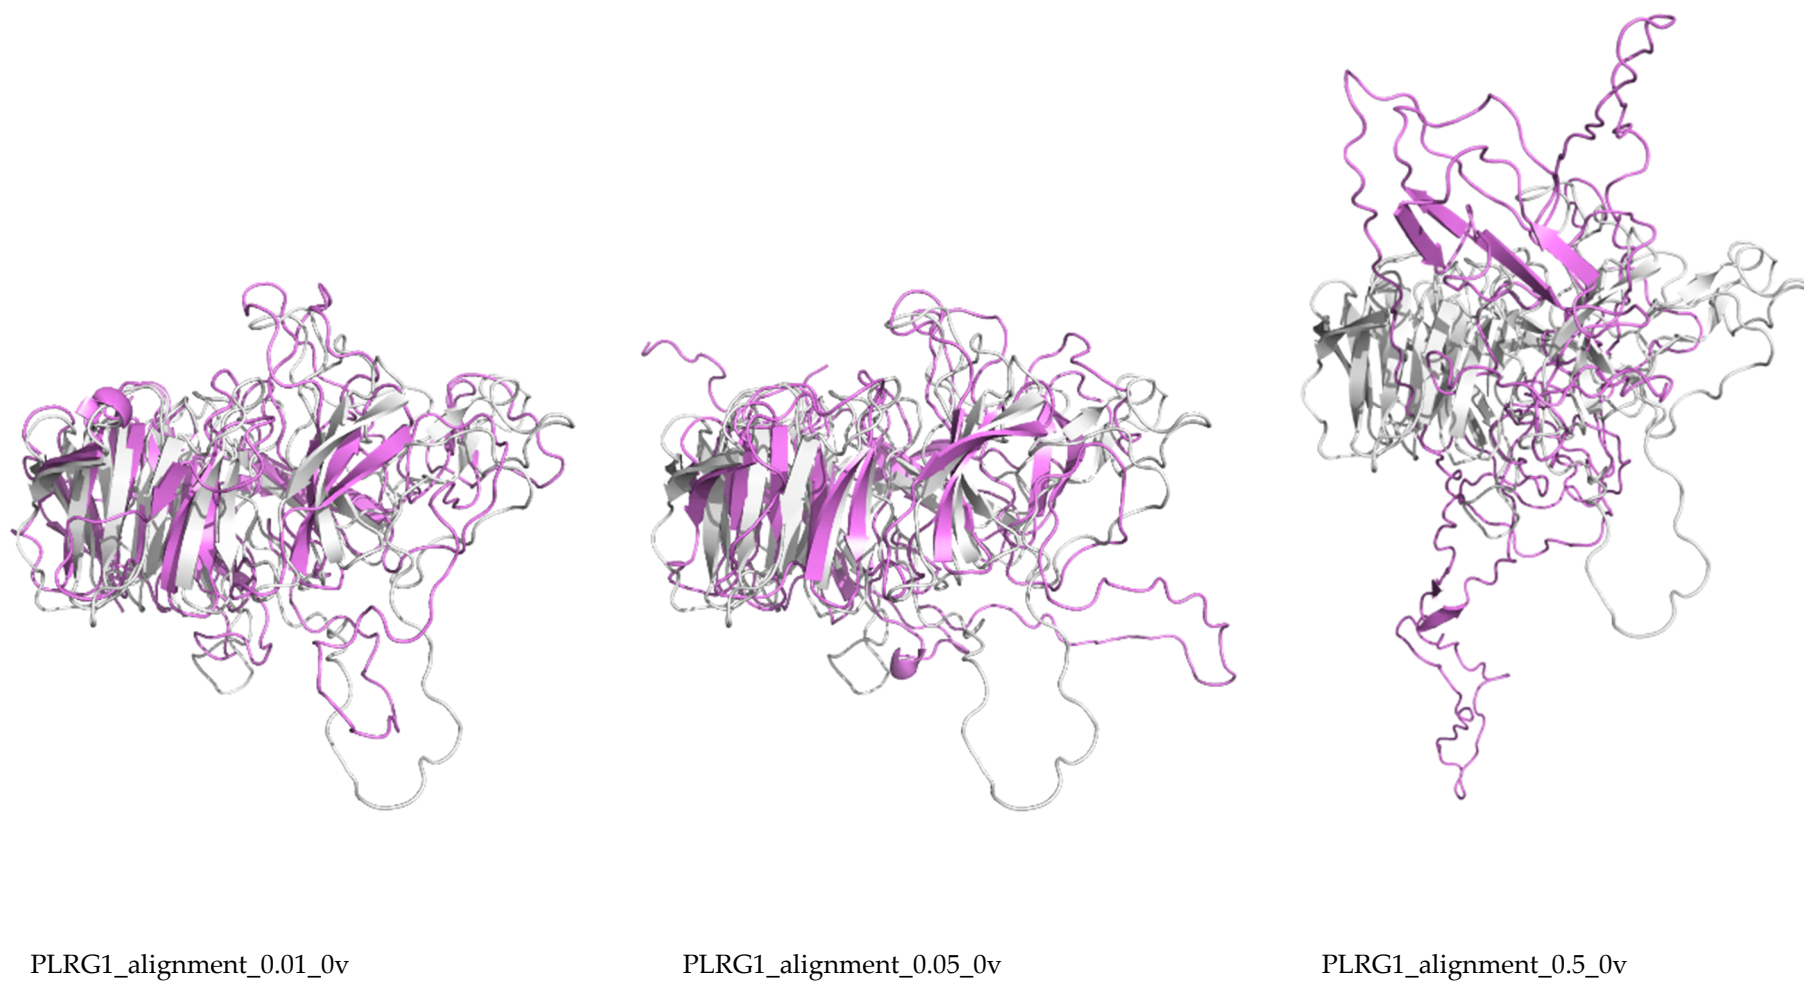

**Figure S30.** Superposition of the MD-optimized (0V) protein structure (gray) and the MD-optimized (0.01, 0.05 and 0.5 mV/mm) protein structure (violet).
