# Supplementary material for: Cellular Processes Involved in Jurkat Cells Exposed to Nanosecond Pulsed Electric Field
Source: Int J Mol Sci. 2019 Nov 21;20(23):5847. doi: 10.3390/ijms20235847 (PMC6929111; doi:10.3390/ijms20235847)
Supplement: Supplementary file 1 [file ijms-20-05847-s001.zip › Supplementary file 2 -tables_proof1.pdf]

# Supplementary Information

## Cellular processes involved in Jurkat cells exposed to nanosecond pulsed electric field

Huijuan Li <sup>1</sup>, Shibin Liu <sup>1,\*</sup>, Xue Yang <sup>1</sup>, Yongqian Du <sup>1</sup>, Jiezhong Luo <sup>1</sup>, Jie Tan <sup>1</sup>, and Yulong Sun <sup>2,\*</sup>

1 School of Electronics and Information, Northwestern Polytechnical University, Xi'an, 710072, China; lihuijuan@mail.nwpu.edu.cn (H.J.L); liushibin@nwpu.edu.cn (S.B.L); yangx@mail.nwpu.edu.cn (X.Y); duyongqian@nwpu.edu.cn (Y.Q.D); 18829237964@163.com (J.Z.L); jietan@mail.nwpu.edu.cn (J.T)

2 Key Laboratory for Space Biosciences & Biotechnology, School of Life Sciences, Northwestern Polytechnical University, Xi'an, 710072, China; yulongsun@nwpu.edu.cn (Y.L.S)

\* Correspondence: liushibin@nwpu.edu.cn (S.B.L); yulongsun@nwpu.edu.cn (Y.L.S);

Tel.: +86 29 88491653 (S.B.L); +86 29 88460332 (Y.L.S)

Address: School of Life Sciences, Northwestern Polytechnical University, 127 Youyi Xilu, Xi' an Shaan

Xi Province, 710072, PR China

Tel.: +86 29 88460332, E-mail: yulongsun@nwpu.edu.cn

## **Table of contents**

### **1. Tables**

.

**Table S1** RMSD value average analysis

| Proteins | Model <sup>a</sup> | 0 v <sup>b</sup> | 0.01 v <sup>b</sup> | 0.05 v <sup>b</sup> | 0.5 v <sup>b</sup> |
|----------|--------------------|------------------|---------------------|---------------------|--------------------|
| SUGP1    | 1.761              | N.D              | N.D                 | N.D                 | N.D                |
| DHX16    | 0.5759             | 0.6216           | 0.5533              | 0.5988              | 9.31               |
| FUS      | 1.029              | 0.9463           | 0.9185              | 0.853               | 7.352              |
| HNRNPR   | 1.517              | N.D              | N.D                 | N.D                 | N.D                |
| DHX15    | 0.3965             | 0.4047           | 0.5067              | 0.3902              | 7.83               |
| NAA38    | 0.6192             | N.D              | N.D                 | N.D                 | N.D                |
| SKIV2L2  | 0.4343             | N.D              | N.D                 | N.D                 | N.D                |
| PLRG1    | 0.6941             | 0.6674           | 0.4666              | 0.7016              | 3.635              |

**Table S2** RMSF value average analysis

| Proteins | Model <sup>a</sup> | 0 v <sup>b</sup> | 0.01 v <sup>b</sup> | 0.05 v <sup>b</sup> | 0.5 v <sup>b</sup> |
|----------|--------------------|------------------|---------------------|---------------------|--------------------|
| SUGP1    | 0.6416             | N.D              | N.D                 | N.D                 | N.D                |
| DHX16    | 0.2550             | 0.3628           | 0.2882              | 0.2725              | 3.601              |
| FUS      | 0.3450             | 0.4874           | 0.4925              | 0.5140              | 5.702              |
| HNRNPR   | 0.6293             | N.D              | N.D                 | N.D                 | N.D                |
| DHX15    | 0.2026             | 0.2220           | 0.2545              | 0.1973              | 4.479              |
| NAA38    | 0.2504             | N.D              | N.D                 | N.D                 | N.D                |
| SKIV2L2  | 0.2165             | N.D              | N.D                 | N.D                 | N.D                |
| PLRG1    | 0.2569             | 0.3955           | 0.2617              | 0.3194              | 1.531              |

Note:

a: compared with MD “protein in water”

b: compared with MD “protein in electric field”

N.D: none data

**Table S3** Rg value average analysis

| Proteins | Model <sup>a</sup> | 0 v <sup>b</sup> | 0.01 v <sup>b</sup> | 0.05 v <sup>b</sup> | 0.5 v <sup>b</sup> |
|----------|--------------------|------------------|---------------------|---------------------|--------------------|
| SUGP1    | 3.436              | N.D              | N.D                 | N.D                 | N.D                |
| DHX16    | 2.512              | 2.662            | 2.579               | 2.598               | 10.46              |
| FUS      | 2.646              | 2.641            | 2.611               | 2.722               | 8.217              |
| HNRNPR   | 2.911              | N.D              | N.D                 | N.D                 | N.D                |
| DHX15    | 2.945              | 2.999            | 2.960               | 2.949               | 8.709              |
| NAA38    | 1.473              | N.D              | N.D                 | N.D                 | N.D                |
| SKIV2L2  | 3.251              | N.D              | N.D                 | N.D                 | N.D                |
| PLRG1    | 2.235              | 2.414            | 2.266               | 2.322               | 4.388              |

Note:

a: compared with MD “protein in water”

b: compared with MD “protein in electric field”

N.D: none data

**Table S4** RMSD value of protein model and MD-optimized protein model

| Proteins | Model <sup>a</sup> | 0.01 v <sup>b</sup> | 0.05 v <sup>b</sup> | 0.5 v <sup>b</sup> |
|----------|--------------------|---------------------|---------------------|--------------------|
| SUGP1    | 13.456             |                     |                     |                    |
| DHX16    | 4.386              | 18.3                | 19.9                | 99.847             |
| FUS      | 10.472             | 8.809               | 10.604              | 32.637             |
| HNRNPR   | 14.815             |                     |                     |                    |
| DHX15    | 1.978              | 2.201               | 1.797               | 73.054             |
| NAA38    | 5.226              |                     |                     |                    |
| SKIV2L2  | 1.775              |                     |                     |                    |
| PLRG1    | 4.558              | 3.714               | 3.332               | 31.329             |
